1 **Ectopic methylation of a single persistently-unmethylated CpG in the promoter of the**  
2 **vitellogenin gene abolishes its inducibility by estrogen through attenuation of USF binding.**

3  
4 Lia Kallenberger<sup>1,2,3</sup>, Rachel Erb<sup>1,2,3,5</sup>, Lucie Kralickova<sup>3</sup>, Andrea Patrignani<sup>4</sup>, Esther Stöckli<sup>2</sup>, Josef  
5 Jiricny<sup>1,2,3</sup>\*

6  
7 <sup>1</sup>*Institute of Molecular Cancer Research, University of Zurich, Winterthurerstrasse 190, CH-8057*  
8 *Zurich, Switzerland*

9 <sup>2</sup>*Institute of Molecular Life Sciences, University of Zurich, Winterthurerstrasse 190, CH-8057*  
10 *Zurich, Switzerland*

11 <sup>3</sup>*Institute of Biochemistry, Swiss Federal Institute of Technology (ETH), Otto-Stern-Weg 3, CH-*  
12 *8093 Zurich, Switzerland*

13 <sup>4</sup>*Functional Genomics Center of the University of Zurich and the ETH Zurich, Winterthurerstrasse*  
14 *190, CH-8057 Zurich, Switzerland*

15 <sup>5</sup>*Present address: Rachel Erb, Sandoz Pharmaceuticals AG, Suurstoffi 14, CH-6343 Rotkreuz,*  
16 *Switzerland*

17  
18  
19 **Running title:** E-box methylation abolishes VTG estrogen inducibility

20  
21  
22 **Funding:** This work was funded by the Swiss National Science Foundation (grants no. 31003A-  
23 149989 and 31003B-170267 to J.J.).

24  
25  
26 \* To whom correspondence should be addressed. Tel: +41 44 633 6260; Email: [jjiricny@ethz.ch](mailto:jjiricny@ethz.ch)

27

## 28 **ABSTRACT**

29 **The enhancer/promoter of the vitellogenin II (VTG) gene has been extensively studied as a**  
30 **model system of vertebrate transcriptional control. While deletion mutagenesis and *in vivo***  
31 **footprinting identified the transcription factor (TF) binding sites governing its tissue**  
32 **specificity, DNase hypersensitivity- and DNA methylation studies revealed the epigenetic**  
33 **changes accompanying its hormone-dependent activation. Moreover, upon induction with**  
34 **estrogen (E<sub>2</sub>), the region flanking the estrogen-responsive element (ERE) was reported to**  
35 **undergo active DNA demethylation. We now show that although the VTG ERE is methylated**  
36 **in embryonic chicken liver and in LMH/2A hepatocytes, its induction by E<sub>2</sub> was not**  
37 **accompanied by extensive demethylation. In contrast, E<sub>2</sub> failed to activate a VTG**  
38 **enhancer/promoter-controlled luciferase reporter gene methylated by SssI. Surprisingly, this**  
39 **inducibility difference could be traced not to the ERE, but rather to a single CpG in an E-box**  
40 **(CACGTG) sequence upstream of the VTG TATA box, which is unmethylated *in vivo*, but**  
41 **methylated by SssI. We demonstrate that this E-box binds the upstream stimulating factor**  
42 **USF1/2. Selective methylation of the CpG within this binding site with an E-box-specific**  
43 **DNA methyltransferase *Eco72IM* was sufficient to attenuate USF1/2 binding *in vitro* and**  
44 **abolish the hormone-induced transcription of the VTG gene in the reporter system.**

45

## 46 **INTRODUCTION**

47 In vertebrates, the DNA methyltransferases DNMT1, DNMT3a and DNMT3b convert around 90%  
48 of cytosines in the CpG sequence context to 5-methylcytosines (Eckhardt et al., 2006; Gruenbaum  
49 et al., 1981; Rakyan et al., 2004). DNMT3a/b are believed to be the major *de novo*  
50 methyltransferases that modify unmethylated DNA, while DNMT1, often termed “maintenance  
51 methylase”, is believed to be the enzyme that copies the methylation pattern of the template strand  
52 onto the newly-synthesised strand following DNA replication or repair (Bacolla et al., 1999; Bestor,

53 1992; Hsieh, 1999; Okano et al., 1998; Pradhan et al., 1999). All three enzymes are essential for  
54 survival, as demonstrated by the fact that DNMT knock-out mice show early lethality (Li et al.,  
55 1992; Okano et al., 1999).

56 DNA methylation is largely erased during fertilisation, but the DNMTs lay down a new  
57 methylation pattern during early embryogenesis that will control the subsequent stages of  
58 development and differentiation. In general, gene bodies become densely-methylated, while gene  
59 regulatory sequences are methylated sparsely and in a highly-divergent manner. For example, many  
60 housekeeping genes are flanked by the so-called CpG islands. Although these regions are CpG-rich,  
61 they are generally unmethylated and the genes they control are constitutively-active (Bird et al.,  
62 1985; Cooper et al., 1983; Gardiner-Garden and Frommer, 1987). In contrast, CpG islands  
63 associated with imprinted genes or retroviral sequences are methylated, as are genes on the inactive  
64 X chromosome (Liu et al., 1994; Walsh et al., 1998; Woodcock et al., 1997) and some become  
65 methylated during development (De Smet et al., 1996; De Smet et al., 1999), which leads to  
66 transcriptional silencing. Once established, DNA methylation patterns remain largely stable and  
67 unprogrammed changes such as the aberrant methylation of CpG islands are often linked to aging or  
68 tumorigenesis (Baylin et al., 1986; Gama-Sosa et al., 1983; Goelz et al., 1985; Noreen et al., 2014;  
69 Toyota et al., 1999). While the latter phenomena have been extensively studied, less attention has  
70 been paid to the dynamic changes of DNA methylation taking place outside of CpG islands (Eden  
71 and Cedar, 1994). These changes are often triggered by exogenous stimuli in a highly tissue-  
72 specific manner and are directly involved in the regulation of gene expression (Amenya et al., 2016;  
73 Kangaspeska et al., 2008; Metivier et al., 2008; Thomassin et al., 2001; Toker et al., 2013) by  
74 altering the binding affinity of TFs such as c-Myc/Myn (Prendergast and Ziff, 1991), E2F  
75 (Campanero et al., 2000), AP2 (Comb and Goodman, 1990), NF- $\kappa$ B (Kirillov et al., 1996) or  
76 USF1/2 (Fujii et al., 2006) for their cognate sequences.

77 One well-studied example of an inducible tissue-specific gene that is also regulated by DNA  
78 methylation is vitellogenin II (*VTG*). The gene encodes a precursor of egg yolk protein and is

79 present in all oviparous species. It is expressed exclusively in the female liver, but can be induced in  
80 males by estrogen (Saluz et al., 1986). This property brought it into recent limelight, because its  
81 expression in males can be used as a measure of estrogenic endocrine disruptive chemicals (EDCs)  
82 in the environment (Diamanti-Kandarakis et al., 2009). As in other species, the chicken *VTG* gene is  
83 expressed in the liver of mature hens, but not roosters. This difference was explained by the  
84 silencing of the *VTG* gene by sex-specific DNA methylation, because its transcriptional activation  
85 in rooster liver by a single  $\beta$ -estradiol (E2) injection was accompanied by demethylation of a *HpaII*  
86 site within the estrogen response element (ERE) (Wilks et al., 1984; Wilks et al., 1982) and the  
87 appearance of DNaseI hypersensitive sites in the enhancer and promoter (Burch and Weintraub,  
88 1983). Subsequent Church & Gilbert sequencing of the genomic DNA showed that the transcription  
89 was activated already after 6 hours and that this event coincided with the demethylation of four  
90 CpGs (**a-d**) in the non-transcribed strand flanking the ERE (Fig. 1A). Because loss of methylation  
91 through replication (the so-called “passive demethylation”) could be excluded, this phenomenon  
92 was hailed as the first example of active demethylation (Saluz et al., 1986).

93 We set out to study the above phenomenon in greater detail, because we wanted to learn  
94 whether the demethylation was an obligate step in the activation of *VTG* expression and, if so,  
95 whether it involved the recently-discovered machinery of active DNA demethylation that makes use  
96 of the ten-eleven-translocation methylcytosine dioxygenase (TET) enzymes (Hassan et al., 2017;  
97 He et al., 2011; Tahiliani et al., 2009) and TDG (Neddermann and Jiricny, 1993; Wiebauer and  
98 Jiricny, 1989). We made use of chicken embryos (Burch and Weintraub, 1983), or of a chicken  
99 hepatoma LMH/2A cell line stably-expressing the estrogen receptor ( $ER\alpha$ ), (Binder et al., 1990;  
100 Philipsen et al., 1988; Seal et al., 1991; Sensel et al., 1994), both of which had been used to study  
101 *VTG* expression in the past. We also made use of a reporter plasmid that was devoid of CpGs and in  
102 which the expression of the luciferase gene was under the sole control of the *VTG*  
103 enhancer/promoter.

104 We now show that estrogen-dependent *VTG* activation in these experimental systems was not  
105 accompanied by significant demethylation. More importantly, we show that the ability of the gene  
106 to reactivate from methylation-dependent silencing is controlled by an unmethylated E-box element  
107 distal to the ERE sequences. Methylation of this E-box abolished the ability of the silenced gene to  
108 be reactivated by estrogen. We further show that the E-box binds the upstream-stimulating factor  
109 USF1/2.

110

## 111 **RESULTS**

112 **The *VTG* enhancer/promoter is methylated and the gene is silenced, but exposure to  $\beta$ -D-**  
113 **estradiol induces transcription independently of DNA replication.**

114 We first wanted to reproduce the phenomenon described by Saluz *et al.* (Saluz et al., 1986).  
115 However, due to restrictions on animal experimentation, we had to search for alternative systems.  
116 We were also interested in identifying an experimental set-up that would be amenable to  
117 manipulation. To this end, we decided to test whether the *VTG* gene is silenced and inducible in the  
118 liver of 10 day-old chicken embryos. We made small windows in freshly-fertilised eggs, sealed  
119 them with a microscope coverslip and hot wax (Baeriswyl and Stoeckli, 2006) and incubated them  
120 at 39°C for 9 days. Eggs containing live embryos were then treated with an ethanol solution of E<sub>2</sub> or  
121 with ethanol alone. 24 hours later, the embryos were sacrificed, the livers were excised, immersed  
122 in RNAlater and nucleic acids and proteins were immediately isolated. In parallel, we treated  
123 chicken LMH/2A cells, a Leghorn rooster hepatocellular carcinoma cell line stably expressing  
124 estrogen receptor alpha (ER $\alpha$ ) (Sensel et al., 1994) in a similar manner, but nucleic acids and  
125 proteins were isolated after 6 and 24 hours.

126 Bisulphite sequencing of DNA isolated from mock-treated liver and LMH/2A cells revealed  
127 that CpGs a/2, c and d in the *VTG* enhancer (Fig. 1A) were ~90% methylated in both strands,  
128 whereas CpG b/1 appeared to be undermethylated in both LMH/2A cells (Fig. 1B) and embryonic  
129 liver (Fig. S1A). This is in line with the results of Saluz *et al.*, where CpGs a/2, c and d in rooster

130 liver DNA were reported to be fully-methylated, whereas CpG b/1 was hemimethylated (Saluz et  
131 al., 1986).

132 Using RT-qPCR, we could show that the *VTG* gene was transcribed neither in LMH/2A  
133 cells nor in embryonic liver prior to exposure to estrogen, but that it was induced upon a 24 hours  
134 E<sub>2</sub> treatment of chicken embryos (Fig. S1B) and even more efficiently in LMH/2A cells, where  
135 substantial transcription was detected already 6 hours after the addition of 100 nM E<sub>2</sub> (Fig. 1C). Its  
136 expression increased further after 24 hours and the increase continued up to 72 hours (Fig. S1C),  
137 possibly due to a positive feedback leading to increased transcription of ER $\alpha$  (Fig. S1D). This  
138 activation occurred in a replication-independent manner, as inhibition of DNA replication by the  
139 addition of the B-family polymerase inhibitor aphidicolin did not impede transcription, but rather  
140 enhanced it (Fig. 1D). A possible explanation for this observation is that interference of replication  
141 with the transcription process is inhibited by the addition of aphidicolin. That DNA synthesis was  
142 indeed inhibited was confirmed by a lack of 5-ethynyl-2'-deoxyuridine (EdU) incorporation into  
143 nuclear DNA during the course of the experiment (Fig. S1E).

144

145 **Estrogen-dependent induction of *VTG* transcription in our system was not accompanied by**  
146 **demethylation of the enhancer/promoter region.**

147 We next set out to investigate whether the estrogen-dependent transcriptional activation of the *VTG*  
148 gene was accompanied by demethylation as reported (Saluz et al., 1986). We therefore performed  
149 PCR on the bisulphite-converted DNA to distinguish cytosines (C) from 5-methylcytosines (mC).  
150 Because active demethylation is believed to involve the dioxygenases TET1-3, we also wanted to  
151 detect the intermediate of the oxidation, 5-hydroxymethylcytosine (hmC). To distinguish between  
152 mC and hmC, the bisulphite conversion was preceded by an oxidation step using KRuO<sub>4</sub>, which  
153 selectively oxidizes hmC to fC, resulting in its conversion to uracil following bisulphite treatment  
154 (Booth et al., 2012). The PCR products were then sequenced using PacBio, which provides  
155 information on single molecules. HmC levels were assessed as the difference in the amount of

156 converted cytosines between bisulphite- and oxidized-bisulphite converted DNA. Using this  
157 approach, we could show that the *VTG* promoter/enhancer was not demethylated during the course  
158 of the induction, but that a small percentage of mCs were oxidized to hmCs, indicating a possible  
159 involvement of the TET enzyme(s) (Fig. S1F).

160

161 **ER $\alpha$  binds to the *VTG* estrogen response element upon treatment with  $\beta$ -estradiol *in vivo*.**

162 As mentioned in the Introduction, DNA methylation can attenuate transcription by interfering with  
163 the binding of TFs to their respective recognition sequences. Because we failed to detect  
164 demethylation in our system, ER $\alpha$ , the key activator of the *VTG* gene, would have had to bind to the  
165 methylated estrogen response element (ERE) in the enhancer upon E<sub>2</sub> treatment. In order to test this  
166 hypothesis, we performed a chromatin immunoprecipitation experiment using an ER $\alpha$  antibody or,  
167 as a control, a flag antibody. We could retrieve ER $\alpha$  in the chromatin fraction only with the ER $\alpha$   
168 antibody and upon E<sub>2</sub> treatment (Fig. 1E, upper panel). Moreover, we could confirm its binding to  
169 the *VTG* ERE using RT-qPCR on the recovered DNA (Fig. 1E, lower panel). Only very little signal  
170 was apparent without E<sub>2</sub> treatment, confirming the widely-accepted model that estrogen receptors  
171 bind DNA *in vivo* only in response to hormone treatment (Klinge, 2001). Moreover, this showed  
172 that the receptor is able to bind to its recognition sequence also in methylated chromatin.

173

174 **Binding of ER $\alpha$  to the ERE is insensitive to different cytosine modifications and hormone  
175 treatment.**

176 To confirm that the binding of ER $\alpha$  to its cognate recognition sequence was indeed unaffected by  
177 methylation, we carried out a series of electrophoretic mobility shift assays (EMSAs), using  
178 synthetic oligonucleotides containing the *VTG* ERE (WT) or a variant with a single base pair  
179 deletion in the three-nucleotide spacer between the palindromic repeats ( $\Delta$ G, Fig. 2A) that has been  
180 reported to abolish ER $\alpha$  binding *in vitro* (Klinge, 2001). Recombinant ER $\alpha$  was able to bind the  
181 ERE sequence with similar affinity in the presence or absence of E<sub>2</sub>, the only notable difference

182 being the slightly-increased mobility of the shifted band in the presence of the hormone (Fig. 2A,  
183 lanes 2,3 and Fig S2A,B). The specificity of the protein/DNA complex was confirmed by a  
184 competition assay; addition of a 100-fold excess of the unlabelled ERE oligo duplex significantly  
185 diminished the intensity of the shifted band (lane 4, spec), while a scrambled sequence failed to do  
186 so (lane 5, unspec). In addition, addition of an ER $\alpha$  antibody to the reaction substantially retarded  
187 (supershifted) the mobility of the specific band (lane 7) as compared to the addition of the same  
188 amount of BSA (lane 6). In the EMSA assays, the affinity of ER $\alpha$  for a substrate symmetrically-  
189 methylated at the two CpGs within the ERE (CpGs c and d, mC/mC) was similar to that seen with  
190 the unmethylated substrate C/C (Fig. 2B) and the same was true for hemi- and fully-  
191 hydroxymethylated substrates, as well as substrates containing formyl- or carboxycytosine (Fig  
192 S2C,D).

193

#### 194 **The ERE is bound by a factor other than ER $\alpha$ in nuclear extracts of LMH/2A cells.**

195 We were interested to learn whether the oligonucleotide substrates were bound with similar  
196 selectivity and affinity also by ER $\alpha$  present in nuclear extracts of LMH/2A cells. In order to limit  
197 non-specific binding, we used shorter substrates than in the previous experiments. As seen in Fig.  
198 2C, the ERE substrates were efficiently bound by recombinant ER $\alpha$  irrespective of methylation  
199 (lanes 1, 3), whereas the  $\Delta$ G oligonucleotide duplex failed to bind the receptor (lane 5).  
200 Unexpectedly, the mobility of the shifted band generated by the unmethylated oligo (C/C) upon  
201 incubation with LMH/2A nuclear extracts (NE) was faster than that seen with ER $\alpha$  (lane 2) and the  
202 factor that bound the unmethylated oligo bound only weakly to the methylated (mC/mC) one (lane  
203 4). In contrast, the  $\Delta$ G substrate was bound with very high affinity (lane 6). In order to ensure that  
204 the factor binding the oligo substrates in the extracts was distinct from ER $\alpha$ , we titrated increasing  
205 amounts of the recombinant protein into the NE. As shown in Fig. 2D (whole gel is shown in Fig  
206 S2E), ER $\alpha$  outcompeted the nuclear factor (referred to as Factor X) in reactions containing the C/C



207 substrate and even more efficiently in reactions containing the mC/mC oligo, but not the  $\Delta$ G  
208 substrate.

209 In order to gain information regarding the substrate preference of Factor X, we carried out  
210 an EMSA assay using eight oligonucleotide substrates carrying sequences flanking the ten CpGs in  
211 the VTG enhancer/promoter (Fig. 1A; the two CpGs in the ERE were in a single duplex, as were  
212 CpGs 5 and 6, because of their proximity). Because the sequence was reported by Saluz *et al.*  
213 (Saluz *et al.*, 1986) to be demethylated in a strand-specific manner, we also included  
214 hemimethylated substrates. Surprisingly, in addition to oligos ERE and  $\Delta$ G, Factor X bound also to  
215 oligos containing CpG b/1, CpG a/2 and CpG7, but not CpG3, CpG4, CpG5-6 and CpG8 (Fig. 2E  
216 and Fig. S2F-H). Moreover, its affinity for hemimethylated substrates varied, which suggested that  
217 its sequence- and methylation specificity was unusually relaxed.

218 To characterize Factor X further, we carried out the EMSA assays with oligos containing  
219 one BrdU residue on each strand (Fig. 3A, Table S2). Upon incubation with the NE, half of the  
220 mixture was used for the EMSA experiment, while the other half was UV-crosslinked and the  
221 proteins were then resolved by SDS-PAGE. During the cross-linking, the radiolabelled oligo  
222 becomes covalently attached to the protein that binds it and the protein size can thus be estimated  
223 from the position of the radioactive band on the SDS-PAGE, once the molecular weight of the oligo  
224 is subtracted. As shown in Fig. 3B, the recombinant ER $\alpha$ -oligo complex migrated at the expected  
225 size of ~80 kDa (lane 5) and a band of similar size was seen in LMH/2A NE cross-linked to the  
226 C/C, mC/C or mC/mC substrates (lanes 1-4). In addition, a second, prominent band migrated at  
227 around 50 kDa, irrespective of substrate. After subtracting the molecular weight of the single-  
228 stranded oligo (~15 kDa), the size of Factor X was predicted to be around 35-40 kDa. When the  
229 recombinant receptor was titrated into the reaction with NE, we saw a weak, but reproducible,  
230 competition with the smaller protein (Fig. 3C). The ~80 kDa band could be outcompeted with a  
231 specific (lane 8, spec), but not with an unspecific (lane 7, unspec) competitor, further confirming  
232 that it was a complex of the oligo with ER $\alpha$ . The addition of E<sub>2</sub> did not alter the binding affinities or

233 ratios of the different proteins to the substrates (Fig. S3A). The migration of the ER $\alpha$  band was also  
234 unchanged in the presence of the hormone, confirming that the mobility shift seen in the EMSA  
235 assay represented a conformational change of the receptor, which is eliminated upon denaturation.

236

237 **Factor X is the E-box-binding heterodimer of upstream stimulating factors USF1/2.**

238 We wanted to learn whether Factor X was a chicken-specific protein, or whether it was present also  
239 in man. We therefore studied the binding properties of the eight oligonucleotide duplexes  
240 containing the ten CpGs in the *VTG* enhancer/promoter (see above) in EMSA experiments using  
241 NEs of the ER $\alpha$ -positive breast cancer cell line MCF7 and the ER $\alpha$ -negative cervical carcinoma  
242 cell line HeLa. As shown in Fig. S3B,C, the electrophoretic mobilities of the protein/DNA  
243 complexes formed in HeLa (ERE,  $\Delta$ G, CpG4 and 7) and MCF7 (CpG4, 5-6, 7 and 8) extracts with  
244 the indicated oligos were similar to those seen in LMH/2A extracts. We therefore assigned them to  
245 Factor X. A distinct mobility shift was seen with oligo CpG3 (Fig. S2G), but the CpG4, 5/6 and 8  
246 substrates failed to form protein/DNA complexes (Fig. 2E, Fig. S2H, Fig S3B,C). Interestingly,  
247 Factor X binding to the different oligos displayed distinct methylation sensitivities; thus, while its  
248 binding to CpG2 was unaffected by methylation, the binding to oligos ERE, CpG1 and in particular  
249 CpG7 was substantially attenuated by methylation (Fig. 2 E). The similarity of the proteins binding  
250 the oligo substrates ERE and CpG7 was further confirmed in UV-crosslinking experiments (Fig.  
251 S3D), thus implying that Factor X is a generic DNA binding protein with an ambiguous sequence-  
252 and methylation specificity.

253 In an attempt to identify Factor X, we subjected nuclear extracts of HeLa cells to affinity  
254 chromatography. We first generated the DNA substrates by ligating the ERE (C/C or mC/mC),  
255 CpG7 (C/C or mC/mC) or  $\Delta$ G oligonucleotide duplexes end-to-end so as to obtain molecules of  
256 100-300 base pairs in length. The sticky ends were then filled-in with dATP and Bio-dUTP and the  
257 tagged molecules were allowed to attach to streptavidin Dynabeads. We then preincubated HeLa  
258 NEs with non-specific competitor poly (dI-dC) and allowed them to incubate with the beads as

259 described in Material and Methods. Following extensive washing, the bound proteins were eluted  
260 with high salt and the tryptic digests were analysed by mass spectrometry (Fig. 4 A). We searched  
261 for peptide sequences present preferentially in the CpG7 and  $\Delta$ G but not in the methylated CpG7  
262 elutions and originating from proteins with molecular size between 25 and 50 kDa. Beads-only and  
263 CpG8 were used as negative controls. The peptides that fulfilled these exclusion criteria to the  
264 greatest extent were the TFs DEC1, MAX, MLX, Myc, USF1 and USF2, firstly because they were  
265 identified with elevated frequencies (Table 1) and, second, because their preferred recognition  
266 sequences overlapped to a large extent with those of our affinity probes.

267 We immunodepleted HeLa nuclear extracts with antibodies against these possible Factor X  
268 candidates and performed EMSA assays. The USF1- or USF2-immunodepleted extracts (Fig. S4A)  
269 largely lost the ability to bind the CpG7 and  $\Delta$ G duplexes and the fraction of the shifted oligos in  
270 the USF2-depleted extracts was clearly reduced (Fig 4B). The same could be shown with the  
271 unmethylated- and methylated ERE substrates (Fig. S4B). For a direct comparison, Fig. S4C shows  
272 an EMSA experiment in which the four oligo substrates were incubated with the USF1-depleted  
273 and IgG-depleted (negative control) extracts. To confirm the depletion specificity, we performed  
274 EMSAs with HeLa NE that were pre-incubated with antibodies raised against the above proteins.  
275 As shown in Fig. 4C, the antibody against USF1 caused a supershift of the complex, while the  
276 antibody against USF2 attenuated the binding of Factor X to the two duplexes. To confirm the  
277 specificity of the depletion further, we carried out a UV-crosslinking experiment with the USF1- or  
278 USF2-depleted extracts, as well as with proteins eluted from the beads with high salt. The effect of  
279 the depletion was not very pronounced (Fig. 4D, lanes 1-4), probably because EMSA assays detect  
280 complexes with relatively long life times, whereas UV-cross-links even transient complexes.  
281 However, a band corresponding in size to Factor X was present in the eluates from the USF1 and  
282 USF2 beads, but not from the control, IgG beads (Fig. 4D). This evidence strongly suggests that  
283 Factor X is a heterodimer of USF1 and USF2, which is known to be methylation-sensitive (Chen et  
284 al., 2012; d'Adda di Fagagna et al., 1995; Fujii et al., 2006). However, our data provide strong

285 evidence that this heterodimer is rather promiscuous in its sequence specificity, contrary to reports  
286 that describe its preference for the perfect E-box consensus CACGTG (d'Adda di Fagagna et al.,  
287 1995; Giacca et al., 1989) present e.g. in the CpG7 duplex.

288

289 **Transcriptional activity of the *VTG* enhancer/promoter is controlled by E-box methylation**  
290 **and USF binding.**

291 In the Saluz *et al.* study (Saluz et al., 1986), the silenced, methylated *VTG* gene was activated by  
292 estrogen and this event was accompanied by demethylation of CpGs **a-d** in the enhancer. These  
293 findings led to the assumption that the E<sub>2</sub>-activated estrogen receptor triggered a series of events  
294 that brought about a demethylation of the ERE and the downstream sequences, and that this  
295 demethylation was a prerequisite for transcriptional activation. However, in our *in vivo* system,  
296 induction of *VTG* transcription with E<sub>2</sub> did not require demethylation (Fig. 1C and Fig S1F). We  
297 therefore had to consider the possibility that the gene was silent in rooster only because of the lack  
298 of the hormone and that its methylation was simply a mark of inactive chromatin. In order to  
299 elucidate this phenomenon, we generated a reporter vector based on the CpG-free pCpGL-basic  
300 plasmid, in which the luciferase gene is driven by the *VTG* enhancer/promoter. We first introduced  
301 into the *VTG* sequence unique *KpnI* and *HindIII* sites on either side of the ERE and then ligated this  
302 enhancer/promoter into pCpGL-basic to generate VTG-CpGL (Fig S5A). Upon transfection of this  
303 reporter into LMH/2A cells, luciferase expression could be efficiently induced with E<sub>2</sub> (Fig 5A,  
304 ERE). Conversion of the wild type ERE sequence to  $\Delta G$  by site-directed mutagenesis resulted in  
305 similar levels of basal transcription, but substantially lower inducibility (Fig. 5A), caused by the  
306 significantly lower affinity of ER $\alpha$  for the  $\Delta G$  ERE lacking the spacer deoxyguanosine (Fig. 2B,C).  
307 *In vitro* methylation of these two reporters with *SssI* largely abolished transcriptional inducibility  
308 (Fig. 5A). When the *KpnI/HindIII* fragment was replaced with the wild type sequence,  
309 unmethylated, methylated or hydroxymethylated at the two CpGs, estrogen inducibility was  
310 unchanged (Fig. 5B). This result extends the *in vitro* findings (Fig. 2B, Fig. S2C) showing that the

311 binding of ER $\alpha$  is unaffected by methylation and shows that its transcriptional activity is also  
312 methylation-independent. (Hydroxymethylation was included, because we detected low levels of  
313 this modification in the *in vivo* activation experiments shown in Fig. S1F.)

314 Having shown that methylation of the ten CpGs in the *VTG* enhancer/promoter by *SssI*  
315 substantially attenuated E<sub>2</sub> inducibility of the reporter (Fig. 5A), but that methylation of the ERE  
316 was without effect (Fig. 5B), we wanted to learn which CpGs were responsible for the  
317 transcriptional silencing. We therefore converted CpGs 1-8 (Fig. 1A) to TpGs by site-directed  
318 mutagenesis. We could show that the C to T transition mutations at CpGs 1-6 and 8 failed to affect  
319 the basal transcriptional activity of the reporter and reduce its inducibility by E<sub>2</sub>. Indeed, the  
320 inducibility was increased in some cases (Fig. S5B). In contrast, C to T mutations in CpGs **c** and **d**  
321 in the ERE (mut ERE) and CpG7 (C594T) attenuated the inducibility upon E<sub>2</sub> treatment (Fig.  
322 S5B,C). To learn whether the mutation in CpG7 affected USF1/2 binding, we tested the mutant  
323 oligo in an EMSA assay and found that the affinity of the protein for the mutated sequence was  
324 intermediate between that of the wt unmethylated CpG7 duplex and the methylated one (Fig. S5D).  
325 This translated directly to luciferase expression, where the mutant CpG7 (C594T) showed  
326 intermediate expression between the wt mock-methylated (wt C) and *SssI*-methylated (wt mC)  
327 reporters (Fig. S5B). The expression of all the mutant reporters was inhibited upon methylation  
328 with *SssI*, showing that the individual sites had no major influence on transcription of the reporter,  
329 irrespective of whether they were methylated or unmethylated (Fig. S5E).

330 In order to exclude the role of CpG1-6 and 8 in the transcriptional regulation of the *VTG*  
331 enhancer/promoter, we mutated them sequentially, such that the final mutant contained only CpG **c**  
332 and **d** in the ERE and CpG7. We tested the single and multiple mutants to exclude the possibility  
333 that interactions between different sites had additional influence on transcription, but this was not  
334 the case. All combinations tested were active when unmethylated and inhibited when methylated  
335 with *SssI* (data not shown). Analysis of the final plasmid (ERE/7 wt) unmethylated and methylated  
336 confirmed that the silencing of the *VTG* enhancer/promoter was mediated by methylation of CpG7

337 in combination with methylation of the ERE (Fig. 5C), even though methylation of ERE alone had  
338 no effect on reporter activity (Fig. 5B).

339 In order to demonstrate the key importance of CpG7 in the control of *VTG* transcription, we  
340 methylated the wt reporter with *Eco72I* methylase (Rimseliene et al., 1995), which modifies solely  
341 the CACGTG E-box sequence. As shown in Fig. 5D, methylation of this site substantially  
342 attenuated basal luciferase expression, as well as its inducibility by E<sub>2</sub>, if not to the same extent as  
343 modification of all ten CpG sites by *SssI* methylase. In contrast, methylation of the reporter with  
344 *HpaII* methylase, which modifies CpG **d** in the ERE, had no appreciable effect on luciferase  
345 expression.

346 In a converse experiment, we wanted to reproduce the methylation pattern seen in the  
347 chicken embryo and in LMH/2A cells. To this end, we cleaved the reporter vector with *PmlI*, which  
348 cuts the E-box sequence and, as control, with *HpaII* that cuts the ERE or *XmnI* that cuts the vector  
349 backbone. We then methylated the linear DNA with *SssI* and recircularised it with T4 DNA ligase.  
350 In the *PmlI*-cut vector, all CpGs with the exception of CpG7 were methylated, whereas only the  
351 *HpaII* site in the ERE remained unmethylated in the *HpaII*-cut vector and all CpGs were methylated  
352 in the *XmnI*-cut vector. Transfection into LMH/2A cells showed that expression of the reporter  
353 luciferase gene could be efficiently induced by E<sub>2</sub> solely when CpG7 was unmethylated (Fig. 5E,  
354 *PmlI*). In contrast, the reporter gene in the *HpaII*- or *XmnI*-cleaved vectors, as well as a plasmid that  
355 was treated with *SssI* without prior cleavage (undigested) were refractory to induction with E<sub>2</sub>.

356 Finally, we wanted to confirm that the transcriptional control of *VTG* expression rests not  
357 only with CpG7, but also with the protein that binds the E-box: USF1/2. We therefore knocked  
358 down USF1 or luciferase (control) with siRNA (Fig. S5F-H) and transfected the cells with the  
359 reporter plasmids 48 hours later. Simultaneously, we assessed the induction of endogenous *VTG* in  
360 the siRNA-treated cells. Knock-down of USF1 reduced luciferase inducibility and the induction of  
361 endogenous *VTG* by more than 50% (Fig. 5F, G) or by a third in the case of luciferase inducibility  
362 with the second siRNA (Fig. S5H, left panel), which shows that USF1/2 plays a key role in the

363 control of *VTG* transcription. (The incompleteness of the silencing could be explained by residual  
364 levels of the factor in the siRNA-treated cells.) This prompted us to conclude that USF1/2 binding  
365 to CpG7 is key to the regulation of expression of *VTG* and that its likely role in the prevention of  
366 methylation of its binding site is essential to ensure that the gene remains poised for ready hormone  
367 activation.

368

## 369 **DISCUSSION**

370 We could confirm the findings of earlier studies and show that the chicken *VTG* gene was heavily-  
371 methylated already in early embryos, as well as in LMH/2A cells, and that it could be induced by a  
372 single dose of  $\beta$ -estradiol. The CpGs in the *VTG* enhancer/promoter seen to be demethylated in  
373 hormone-treated rooster liver (Saluz et al., 1986; Wilks et al., 1984; Wilks et al., 1982) remained  
374 resistant to bisulphite conversion in our experimental systems, however, we were able to detect low  
375 levels of the TET oxidation product hmC already 6 hours after  $E_2$  treatment that increased further  
376 with longer exposure to  $E_2$ . The TET enzymes and TDG are present in both chicken embryonic and  
377 adult liver, as well as in the LMH2A cell line (data not shown), and it is therefore possible that the  
378 hormone-activated *VTG* gene is indeed targeted for demethylation, but that, unlike in the rooster,  
379 the demethylation machinery in our experimental set-up is not fully-functional. The finding that  
380 hmC proportion increased at the four CpGs upon hormone treatment at longer time points and that  
381 *VTG* induction was higher upon TET2 overexpression (data not shown) implied that the  
382 demethylation machinery can act on the *VTG* locus and that it has a positive effect on transcription.  
383 This could be further confirmed in cells treated with 5-azadeoxycytidine prior to induction with  $E_2$ .  
384 In these cells, *VTG* expression was several-fold higher than even in the TET2-overexpressing cells  
385 (data not shown).

386         Puzzlingly, we failed to find evidence of hmC oxidation to fC or caC, steps necessary for  
387 the TDG-initiated base excision repair process that completes the multistep demethylation process.  
388 It is conceivable that the TET-mediated cascade terminated in our system after a single oxidation

389 step, but this clearly wasn't the case in the rooster experiments, where the genomic DNA became  
390 susceptible to cleavage with *HpaII* that does not cleave hydroxymethylated DNA (Wilks et al.,  
391 1984; Wilks et al., 1982). Another possibility is that fC and caC excision and the subsequent BER  
392 steps were extremely rapid and were followed by immediate remethylation. Although such cyclic  
393 DNA demethylation/methylation events have been described in the pS2 promoter upon hormone  
394 treatment, it is unlikely that this was so in our system, because the cycling process suppresses  
395 transcription (Kangaspeska et al., 2008; Metivier et al., 2008).

396 Although the above phenomenon requires further study, our data demonstrate that while  
397 global DNA demethylation facilitates transcription of the endogenous *VTG* gene upon hormone  
398 activation, site-specific demethylation of the ERE region is clearly not necessary. This agrees with  
399 our *in vitro* data (Fig. 2B) showing that the ER $\alpha$  binding to the ERE was unaffected by methylation.  
400 Indeed, the hormone-activated receptor needs to be able to bind to its cognate sequence irrespective  
401 of its methylation status, in order to recruit the chromatin-remodelling- and possibly also the  
402 demethylation machinery that are needed to facilitate transcription.

403 Given the requirement for ER $\alpha$  binding in E<sub>2</sub>-dependent *VTG* activation, the weak  
404 inducibility of the  $\Delta$ G ERE reporter was puzzling, because the  $\Delta$ G oligonucleotide did not  
405 detectably bind the receptor *in vitro* (Fig. 2B, C). However, it is possible that the observed  
406 induction was mediated by a second, imperfect ERE sequence, which lies around position -350  
407 from the transcription start site (Fig. 1A).

408 As mentioned in the Introduction, the *VTG* enhancer/promoter has been studied extensively  
409 in the past and it could be shown that it contains several TF binding sites that control its basal- and  
410 liver-specific transcription, as well as its hormone-inducibility. Linker-scanning mutagenesis (Seal  
411 et al., 1991) revealed that deletion of the sequence between -113 and -335 eliminated the hepatocyte  
412 specificity, permitting the reporter construct to be expressed also in fibroblasts. Importantly,  
413 insertion of a linker around position -50 abolished estrogen inducibility of the reporter. This  
414 mutation disrupted the E-box sequence, which contains CpG7 identified in this study as being



415 critical for hormone induction of the silenced gene. Clearly, the interaction of the E-box binding  
416 factor (in our case the USF1/2 heterodimer) with the estrogen receptor is essential for hormone  
417 activation, given that mutational inactivation (Seal et al., 1991) or methylation (this study) of the E-  
418 box attenuates USF1/2 binding *in vitro* and the inducibility of the gene *in vivo*, as does mutation  
419 (but not methylation) of the ERE (Fig. S5B, C).

420 The interaction of different TF combinations bound at promoters and enhancers potentially  
421 provides cells with an enormous flexibility of gene expression, and DNA methylation extends this  
422 range still further by altering the affinity of some, but not all, TFs for their respective recognition  
423 sites. Moreover, the E-box hexamer consensus sequence CANNTG has been shown to bind a large  
424 family of basic helix-loop-helix leucine zipper (b-HLH-LZ) proteins that can bind as homo- or  
425 heterodimers, and often in methylation-sensitive manner (Fujii et al., 2006; Hou et al., 2012; Perini  
426 et al., 2005; Prendergast et al., 1991; Prendergast and Ziff, 1991). Yet, in spite of the multitude of  
427 proteins that could potentially bind to the *VTG* E-box (see Table 1) and the plethora of possible  
428 protein/protein interactions (both activating and repressing) that this could generate, *VTG*  
429 expression is strictly-controlled and appears to require exclusively USF1/2. This was unexpected.  
430 USF1/2 has been reported to interact with ER $\alpha$  and to bind preferentially to the perfect E-box  
431 sequence CACGTG and less so to CATGTG (Corre and Galibert, 2005; deGraffenried et al., 2004).  
432 This could explain why the C to T mutation in CpG7 had such a deleterious effect on estrogen  
433 inducibility (Fig. S5B, C). However, it does not explain why the factor bound so efficiently to the  
434 different sequences in our EMSA assays (Fig. 2D,E; Fig. S2F,G,H). Similarly, methylation of the  
435 E-box sequence would also lower the E<sub>2</sub> inducibility of the *VTG* enhancer/promoter, because the  
436 affinity of USF1/2 for the methylated sequence is low (Fig. 2D, E). As noted above, however, there  
437 are a number of TFs that could potentially bind to the E-box in the absence of USF1/2 and activate  
438 *VTG* transcription, particularly as some – notably c-Myc – have been reported to interact with ER $\alpha$   
439 (Cheng et al., 2006). These questions require clarification in the future, as does the reason why the  
440 *VTG* E-box sequence is the only CpG site out of the ten that remains unmethylated *in vivo*. It is

441 possible that its methylation is actively prevented, possibly due to the fact that it is rapidly bound by  
442 USF1/2 or other E-box proteins and thus that the access of methyl transferases to this site is  
443 hindered. This has been proposed as a possible mechanism that protects CpG islands from *de novo*  
444 methylation (Brandeis et al., 1994; Macleod et al., 1994), but whether inducible  
445 enhancers/promoters where only a single site is affected are subject to similar protection from  
446 methylation remains to be demonstrated.

447 DNA methylation changes, particularly hypermethylation, have been associated with a long  
448 list of pathologies and disorders, ranging from cancer, immune system dysregulation (Crohn's  
449 disease, Grave's disease, rheumatoid arthritis, type 1 diabetes), neurological disorders (Alzheimer's  
450 disease, Fragile X syndrome, schizophrenia, epilepsy, depression) and atherosclerosis to  
451 osteoporosis (Ehrlich, 2019). In the vast majority of the studies concerned with the human  
452 methylome, focus was placed on CpG islands and other CpG-rich regions, the hypermethylation (or  
453 indeed hypomethylation) could be seen to be associated with the given pathology. Our study  
454 highlights an important caveat of these studies, namely, that the alteration of the methylation status  
455 of a single CpG can have equally dramatic consequences as the hypermethylation of a CpG island.  
456 The outcome of both events can be the silencing – or at least attenuation - of transcription.  
457 Interestingly, the two main protagonists of this study, ER $\alpha$  and USF1/2, may be implicated  
458 (separately and together) in a subset of the above syndromes. USF1/2 plays a major role in cell  
459 proliferation control, as well as in the control of expression of the *TP53* (Hale and Braithwaite,  
460 1995; Reisman and Rotter, 1993) and *BRCA2* genes but it has been reported to be transcriptionally  
461 inactive in three of six transformed breast cancer cell lines (Ismail et al., 1999), the widely-used  
462 MCF7 line among them, which has a hypermethylator phenotype (Xing and Archer, 1998). The two  
463 TFs interact in the transcriptional activation of the Cathepsin D gene, the dysregulation of which is  
464 linked to a number of the above-listed disorders (Dubey and Luqman, 2017). It will be interesting to  
465 learn whether some of these dysregulation events might be linked to the aberrant methylation of  
466 USF1/2/ E-boxes within the transcriptional control regions of genes involved in these pathologies.

467

## 468 **MATERIALS AND METHODS**

### 469 *Cell culture*

470 LMH/2A cells (ATCC CRL-2118) were grown in Williams' E medium (GIBCO) without phenol  
471 red, supplemented with 10% charcoal-stripped FCS, streptomycin/penicillin (100 U/ml) and L-  
472 glutamine (2.4 mM). MCF-7 cells were grown in DMEM (GIBCO) with phenol red, supplemented  
473 with 10% FCS, streptomycin/penicillin (100 U/ml) and insulin (Sigma-Aldrich, 10 µg/ml). Cell  
474 lines were grown at 37°C in a 6% CO<sub>2</sub> humidified atmosphere. Where indicated, cells were treated  
475 with 100 nM β-estradiol (E<sub>2</sub>, ethanol solution, Sigma-Aldrich) or an equivalent volume of ethanol,  
476 or with 8 µM aphidicolin (aph, DMSO solution, Sigma-Aldrich) or an equivalent volume of  
477 DMSO. E<sub>2</sub> and/or aphidicolin were added fresh every 12 h, because of instability under cell culture  
478 conditions. RNA interference was carried out using Lipofectamine RNAiMAX (ThermoFisher)  
479 according to the manufacturer's instructions. SiRNA against chicken 1-USF1:  
480 5'CCCAAUAUCAAAUAUGUCUUC<sup>3'</sup>; 2-USF1: 5'UAUGUCUUCGCGCACAGAGAUU<sup>3'</sup>; against  
481 luciferase (control): 5'CGUACGCGGAAUACUUCGAdTdT<sup>3'</sup>.

482

### 483 *Handling and treatment of fertilized eggs*

484 Eggs were prepared as described (Baeriswyl and Stoeckli, 2006) and kept at 39°C. At day 9, the  
485 eggs were treated with ethanol or 100 nM E<sub>2</sub> by pipetting ~55 µl (depending on weight of egg) of a  
486 100 µM solution (10% EtOH) into the egg, through the window prepared at day 3 of development.  
487 24 hours later, the embryos were sacrificed, the livers were excised and immersed in *RNAlater*  
488 (Sigma). Livers were homogenized using a Tissue Ruptor (Qiagen) in RIPA buffer for proteins and  
489 in RLT buffer for RNA. Following homogenization, protein samples were processed further  
490 according to the Western Blot protocol and RNA was extracted using an RNAeasy Kit (Qiagen).

491

### 492 *Western Blotting (WB)*

493 Cells were collected using trypsin, washed in phosphate-buffered saline (PBS) and lysed in RIPA  
494 buffer (50 mM Tris pH 8, 1 mM EDTA, 1% NP-40, 0.5% deoxycholate (DOC), 0.1% SDS, 150  
495 mM NaCl). Lysates were sonicated (18 s, 50 cycles, 70% amplitude; in a Bandelin Sonoplus  
496 GM70) and protein concentrations were measured using the Bradford assay. 30-80 µg of protein  
497 were boiled in 1x SDS loading buffer (50 mM Tris, pH 6.8, 10% glycerol, 1.6% SDS, 0.1 M DTT,  
498 0.01% bromophenol blue) and separated on polyacrylamide gels (6-10%) in 10% SDS-running  
499 buffer at 130 V. Proteins were transferred onto activated PVDF membranes (Amersham Pharmacia  
500 Biotech) which were incubated with primary antibody overnight at 4°C in 5% milk, washed 3x with  
501 TBS-T and incubated for 1 hours at RT with the secondary antibody (horseradish peroxidase-  
502 conjugated sheep anti-mouse or donkey anti-rabbit IgG, GE Healthcare). Membranes were analyzed  
503 with a Fusion Solo (Vilber Lourmat). Antibodies used were mouse Anti-VTG (Abcam, ab36794),  
504 rabbit Anti-TFIIH p89 (Santa Cruz, sc-293), mouse Anti-ERα (ThermoFisher, MA5-13065), rabbit  
505 Anti-USF1 (GeneTex GTX16396), mouse Anti-USF2 (Santa Cruz, sc-293443).

506

#### 507 *Real-time quantitative PCR (RT-qPCR)*

508 Cells were harvested using trypsin and RNA was extracted according to manufacturer's instructions  
509 (RNeasy, Qiagen). 2 µg of the extracted RNA were reverse-transcribed using the high capacity  
510 cDNA reverse transcription kit (Applied Biosystems) according to manufacturer's instructions. 125  
511 ng of the cDNA were used for the PCR using the platinum SYBR green qPCR superMix-UDG kit  
512 (Invitrogen) according to manufacturer's instructions, except that the reaction was scaled down  
513 from 50 µl to 20 µl. The standard cycling program for ABI instruments was used (50°C for 2 min,  
514 95°C for 2 min, 40x (95°C for 15 s, 60°C for 30 s) and melting curve analysis at 65°C for 15s,  
515 heating to 97°C with continuous acquisition per 5°C, 40°C for 30 s). The RT-qPCR was run on a  
516 LightCycler 480 (Roche). GAPDH primers were used as an internal control. Technical triplicates  
517 were made for every sample and primer. The primers used are listed in Table S1 (SI).

518

519

520

521 *Chromatin immunoprecipitation*

522 75 Mio LMH/2A cells were harvested after 24 hours treatment with 100 nM E<sub>2</sub> or EtOH. Cells  
523 were washed twice with PBS and fixed for 10 min in 1% formaldehyde at RT. Fixation was  
524 quenched with 125 mM glycine at RT for 10 min. Cells were collected by centrifugation at 300 x g  
525 for 5 min at 4°C, washed twice with PBS and the pellet was resuspended in cell lysis buffer (10 mM  
526 Tris, pH 8, 1 mM EDTA, 0.5% IGEPAL, protease inhibitors) and incubated on ice for 10 min. The  
527 lysate was centrifuged at 2'000 x g at 4°C for 5 min. The pellet was resuspended in nuclear lysis  
528 buffer (10 mM Tris, pH 8, 1 mM EDTA, 0.5 M NaCl, 1% Triton X-100, 0.5% sodium  
529 deoxycholate, 0.5% lauroylsarcosine, protease inhibitors) and incubated on ice for 10 min with  
530 repeated vortexing. Lysate was centrifuged at 3'000 x g for 5 min at 4°C. The pellet was  
531 resuspended in PBS, split for different immunoprecipitations and centrifuged at 3'000 x g for 10  
532 min at 4°C. Pellets were resuspended in 300 µl lysis buffer (10 mM Tris, pH 8, 1 mM EDTA, 150  
533 mM NaCl, 0.1% sodium deoxycholate, 0.1% SDS, protease inhibitors) and sonicated at maximum  
534 power for 10 min with 30 s intervals in a Bioruptor (Diagnode). Samples were centrifuged at 16'000  
535 x g for 10 min at 4°C and the supernatant was collected. Input samples (15%) were frozen and the  
536 rest was made up to 1 ml with IP buffer (16.7 mM Tris, pH 8, 1.2 mM EDTA, 300 mM NaCl, 1.1%  
537 Triton X-100, protease inhibitors). 5 µg of the respective antibodies (Anti-ER $\alpha$ ; ThermoFisher  
538 MA5-13065 or Anti-Flag; Sigma F3165) were added to the lysate and incubated on a rotating wheel  
539 at 4°C overnight.

540 The beads (G protein Sepharose, GE Healthcare) were washed twice in IP buffer and centrifuged  
541 for 2 min at 2'700 x g before blocking with 1 mg/ml BSA in IP buffer for 1 h. After one additional  
542 wash, 50 µl of beads were added to 1 ml lysate with the antibody. The mixture was incubated for 3  
543 hours on a rotating wheel at 4°C. Mixtures were centrifuged for 2 min at 2'000 x g and the  
544 supernatant was removed. The beads were washed successively in 1 ml of four different wash

545 buffers for 5 min on the rotating wheel (wash buffer 1: 20 mM Tris, pH 8, 2 mM EDTA, 0.1% SDS,  
546 1% Triton X-100, 300 mM NaCl; wash buffer 2: like wash buffer 1, but with 500 mM NaCl; wash  
547 buffer 3: 10 mM Tris, pH 8, 1 mM EDTA, 1% sodium deoxycholate, 500 mM LiCl, 1% NP-40;  
548 wash buffer 4: 10 mM Tris, pH 8, 1 mM EDTA). One additional wash with wash buffer 4 was  
549 performed, during which the beads were divided for DNA and proteins. For proteins: the beads  
550 were taken up in 2x SDS loading dye (100 mM Tris, pH 6.8, 20% glycerol, 3.2% SDS, 0.2 mM  
551 DTT, 0.04% bromophenol blue), the mixture was vortexed vigorously and incubated for 30 min at  
552 100°C (denaturing and de-cross-linking). The beads were spun down and the supernatant was  
553 loaded on an SDS-PAGE together with inputs. Gels were processed further according to general  
554 WB protocol. For DNA: beads and inputs were taken up in 100 µl crosslink reversal buffer (20 mM  
555 Tris, pH 8, 0.5 mM EDTA, 0.1 M NaHCO<sub>3</sub>, 1% SDS, RNase at 10 µg/ml (Roche)) and incubated at  
556 65°C overnight. The next day, the DNA was purified using the PCR purification kit from Qiagen  
557 and eluted in 10 µl of H<sub>2</sub>O. RT-PCR was performed on 3.5 µl of DNA using the platinum SYBR  
558 green qPCR superMix-UDG kit (Invitrogen) according to manufacturer's instructions, except that  
559 the reaction was scaled down to 20 µl and 1 mM of MgCl<sub>2</sub> were added. The following protocol was  
560 used for amplifications: 50°C for 2 min, 95°C for 2 min, 50x (95°C for 15 s, 57°C for 30 s) and  
561 melting curve analysis at 65°C for 15 s, heating to 97°C with continuous acquisition per 5°C, 40°C  
562 for 30 s). The qPCR was run on a LightCycler 480 (Roche) with the ChIP primers listed in table S1.

563

#### 564 *Labelling of oligos*

565 Fill-in reaction (3'-labelling): 2 pmoles of oligo duplex with a 5'-overhang were incubated for 15  
566 min at RT with 0.2 µl of the respective [ $\alpha$ -<sup>32</sup>P]-dNTP (2 µCi, Hartman Analytic), 1 mM of each of  
567 the other three dNTPs and 5 U Klenow fragment (3'→5' exo-, NEB) in the corresponding buffer.  
568 The enzyme was heat-inactivated for 20 min at 75°C and the reaction was allowed to slowly cool  
569 down to re-anneal the strands. The free dNTPs were removed on a Sephadex G-25 column (GE  
570 Healthcare).

571 Kinase reaction (5'-labelling): 2 pmoles of ssDNA were phosphorylated with 0.7  $\mu$ l of [ $\gamma$ - $^{32}$ P]-ATP  
572 (7  $\mu$ Ci, Hartman Analytic) using T4 polynucleotide kinase (10 U, NEB). The reaction was  
573 supplemented with 10 mM DTT and incubated for 30 min at 37°C. The reaction was heat-  
574 inactivated for 5 min at 95°C and the free nucleotides were removed on a Sephadex G-25 column  
575 (GE Healthcare). The oligo was annealed to a 1.5x excess of the unlabelled complementary strand  
576 by heating for 5 min to 80°C and slowly cooling to RT in annealing buffer (50 mM Hepes, pH 7.5,  
577 100 mM NaCl).

578

#### 579 *Nuclear extracts*

580 All nuclear extracts were prepared according to Dignam et al. (Dignam et al., 1983), with or  
581 without pre-treatment of the cells with E<sub>2</sub>.

582

#### 583 *Electrophoretic Mobility Shift Assay (EMSA)*

584 All EMSA reactions were carried out in binding buffer (10 mM Tris-HCl, pH 7.6, 50 mM NaCl, 1  
585 mM DTT, 1 mg/ml BSA, 5% glycerol (Hyder et al., 1999)) in a volume of 5  $\mu$ l using the unspecific  
586 competitor poly(dI-dC) (Sigma-Aldrich). 20 ng of poly(dI-dC) were used for 100 ng of  
587 recombinant ER $\alpha$  (ThermoFisher, RP-310) and 1  $\mu$ g for 10  $\mu$ g of nuclear extracts. For all EMSAs,  
588 10 fmol of [ $\alpha$ - $^{32}$ P]-dNTP labelled, or [ $\gamma$ - $^{32}$ P]-ATP phosphorylated oligos were used. Where  
589 indicated, an excess of unlabelled competitor DNA or 100 nM of E<sub>2</sub> were added. For the supershift  
590 assays, 200 ng of antibody (Anti-ER $\alpha$ ; ThermoFisher MA5-13065) were added together with the  
591 proteins. Proteins, and competitor or antibodies where indicated, were incubated for 20 min on ice  
592 in binding buffer. Labelled DNA was added and the mixture was left at RT for another 20 min  
593 before loading on a 5% polyacrylamide gel (Acryl/ Bis 29:1, Amresco) eluted with 1x TAE (40 mM  
594 Tris, 20 mM acetate, 1 mM EDTA). The gels were run at 200 V for 1 hours in 1x TAE and dried in  
595 a gel dryer for 1 h. The gels were exposed to phosphor screens and the autoradiographs were

596 developed in a Typhoon FLA 9500 (GE Healthcare Life Sciences). The oligonucleotides used are  
597 listed in Table S2 (SI).

598

#### 599 *SDS-PAGE of cross-linked binding reactions*

600 EMSAs were performed as described and cross-linked for 5 min (~720 mJ) in a UV Stratalinker  
601 1800 (Stratagene). Samples were taken up in 2x SDS loading buffer and boiled for 5 min before  
602 being loaded on a 7.5 % denaturing polyacrylamide gel and run for 1-2 hours in 10 % SDS-running  
603 buffer at 130 V. Gels were dried for 1 h, exposed to phosphor screens and developed in a Typhoon  
604 FLA 9500 (GE Healthcare).

605

#### 606 *CpGL cloning and Luciferase assay*

607 The enhancer/promoter region of the chicken vitellogenin II gene spanning nucleotides -638 to -1  
608 was cloned into a CpG-free firefly luciferase plasmid (pCpGL-basic, InvivoGen) using *HindIII* and  
609 *NcoI*. The enhancer/promoter region was amplified from genomic DNA of LMH/2A cells using the  
610 primers 'enhancer fwd and rev' (Table S1, SI). The plasmid was further cut with *HindIII* and *HpaII*  
611 to excise the intervening sequence and the annealed upper  
612 5'AGCTTAAAAATATTCCTGGTCAGCGTGAC<sup>3'</sup> and lower  
613 5'CGGTCACGCTGACCAGGAATATTTT<sup>3'</sup> ds-oligo was ligated into the plasmid to translocate  
614 the *HindIII* site closer to the ERE for further ligations of the ERE. On the other side of the ERE a  
615 *KpnI* site was created by mutagenesis and another *KpnI* site in the plasmid had to be destroyed by  
616 mutagenesis (primers in Table 1, SI).

617 The resulting VTG-CpGL plasmid was co-transfected with a Renilla luciferase-expressing plasmid  
618 (pRL-SV40, Promega) into LMH/2A cells using Lipofectamine 2000 (Invitrogen) according to  
619 manufacturer's instructions. Cells were re-seeded the next day in technical triplicates both for E<sub>2</sub>  
620 and ethanol treatment and treated for 24 h. Cells were subsequently lysed directly in firefly  
621 luciferase substrate from Promega (Dual-Glo Luciferase kit) for 30 min, with vigorous shaking.



622 Cell lysates were processed further according to manufacturer's instructions and luminescence was  
623 measured on the SpectraMax i3 (Molecular Devices) plate reader. Relative luciferase units (RLU)  
624 were calculated as the ratio between the firefly and *Renilla* signals.

625

#### 626 *Mutagenesis of VTG-CpGL*

627 200 ng of vector DNA were mixed with 50 pmoles forward and reverse primers, 250  $\mu$ M dNTPs,  
628 2% DMSO and 1 U Phusion high fidelity polymerase (NEB) in 1x buffer provided by the  
629 manufacturer. Extension was performed in 50  $\mu$ l according to the following protocol: 95  $^{\circ}$ C, 2 min;  
630 30x (95  $^{\circ}$ C, 1 min, 55  $^{\circ}$ C, 1 min, 63  $^{\circ}$ C, 30 min); 68  $^{\circ}$ C, 20 min; 15  $^{\circ}$ C hold. Extension reaction was  
631 digested twice with 20 U *DpnI* for 1 hours at 37 $^{\circ}$ C followed by heat inactivation of the enzyme for  
632 20 min at 80 $^{\circ}$ C. The reaction mix was then transformed into electro-competent Pir1 bacteria (R6K  
633 gamma ORI, Invitrogen) after being desalted by incubating for 15 min on a 0.025  $\mu$ m Millipore  
634 nitrocellulose filter on H<sub>2</sub>O. Bacteria were shaken at 37 $^{\circ}$ C for 40 min and plated onto Zeocin (25  
635  $\mu$ g/ml, InvivoGen) agar plates. Clones were picked the next day, grown in liquid culture overnight  
636 and plasmids were extracted using the NucleoSpin Plasmid Kit (Macherey-Nagel) according to  
637 manufacturer's instructions. Plasmids were sequenced at Microsynth to check for successful  
638 mutagenesis. The primers for mutagenesis are listed in Table S1 (SI).

639

#### 640 *Ligation of modified ERE into VTG-CpGL*

641 50  $\mu$ g of the plasmid DNA were cut with *HindIII*-HF (NEB) in Cut Smart buffer with 100 U of  
642 enzyme for 1.5 hours at 37 $^{\circ}$ C in 50  $\mu$ l. Linearization was verified on a 1% agarose gel and enzyme  
643 was heat-inactivated for 20 min at 80 $^{\circ}$ C. For the first ligation step, 10  $\mu$ g of linearized DNA and  
644 20x excess of annealed oligo with different modifications at the CpGs (ERE insert, Table S1, SI)  
645 were incubated for 2 hours at RT in T4 ligase buffer with 400 U of T4 ligase (NEB) in a total  
646 volume of 100  $\mu$ l. Ligase was inactivated by heating to 65 $^{\circ}$ C for 10 min and efficient ligation was  
647 verified on an agarose gel. Reaction volume was increased to 200  $\mu$ l with 1x Cut Smart buffer, 40 U

648 of *KpnI*-HF (NEB) were added and incubation was continued for additional 1.5 hours at 37°C. 20  
649 U of *HindIII*-HF were then added, the mixture was incubated for an additional hour and  
650 subsequently cleaned-up on MinElute columns (5µg per column, Qiagen) and eluted in 20 µl H<sub>2</sub>O.  
651 20 reactions of the first ligation were pooled for the second ligation. 12.5 µg of DNA from the first  
652 ligation were incubated in 10 ml of 1x T4 ligase buffer with 4000 U of ligase for 1 hours at RT.  
653 Recircularization was verified on an agarose gel. The resulting mix was concentrated by EtOH  
654 precipitation and the supercoiled form of the plasmid was extracted on a CsCl gradient and purified  
655 further as described (Baerenfaller et al., 2006).

656

### 657 *Expression and purification of Eco72IM*

658 The *Eco72IM* sequence was PCR-amplified from the *Eco72IRM* plasmid (Thermo Fisher) and  
659 recombined with the pDONR 221 (Gateway, Thermo Fisher) to form an entry vector. The resulting  
660 entry vector was recombined with pDest15 (Gateway) adding an N-term GST tag to the  
661 methyltransferase. BL21 pLysS *E. coli* (Promega) were transformed with the expression vector. A  
662 starter culture (5 ml) was grown from a single colony and subsequently used to inoculate a 1 l  
663 culture that was grown at 37°C to an OD of 0.65. Culture was cooled down to 22°C, a sample of  
664 uninduced culture was taken for SDS gel and protein expression was induced with the addition of  
665 250 µM IPTG with shaking overnight. The next day, bacteria were washed with cold PBS by  
666 centrifugation at 4'000 x g for 10 min at 4 °C. 14 ml lysis buffer (100 µg/ml Lysozyme, 1 % Triton,  
667 1 mM PMSF, 1 x protease inhibitor (cOmplete, Roche), 10 mM DT, 1 x PBS) were added to pellet  
668 and lysate was incubated for 30 min in a beaker stirring at 4 °C. Lysate was sonicated twice for 1  
669 min on ice (ampl 70%, 50% cycle), together with uninduced sample for SDS gel and centrifuged at  
670 18'000 x g for 30 min at 4 °C. GSH beads (GE Healthcare, 600 µl) washed in lysis buffer were  
671 added to the supernatant and incubated on a rotating wheel for 2 hours at 4 °C. The beads were  
672 then washed three times in washing buffer (10% glycerol, 10 mM DTT, 1 mM PMSF, 1 x PBS) by  
673 inverting the tube several times followed by centrifugation at 500 x g for 5 min. Flow-through and

674 first wash were retained for the SDS gel. The beads were then incubated with 500  $\mu$ l elution buffer  
675 (washing buffer with freshly-added 20 mM glutathione, pH adjusted to 8 with NaOH) on rotating  
676 wheel at 4 °C. The first elution was aliquoted and snap frozen.

677

#### 678 *In vitro methylation*

679 1  $\mu$ g of plasmid DNA was incubated in 1x NEB buffer 2 (*SssI*) or Eco72IM buffer (10 mM Tris  
680 HCl, 50 mM NaCl, 1 mM DTT, 10 mM EDTA), 160  $\mu$ M freshly-diluted SAM (NEB) and 4 U of  
681 *SssI* (NEB) or 4  $\mu$ l purified *Eco72IM* (diluted 1:100) for 1 hours at 37°C. The reaction was stopped  
682 by heating to 65°C for 20 min.

683

#### 684 *EdU incorporation and Click-iT Reaction*

685 The cells were grown on coverslips and treated with 8  $\mu$ M aphidicolin or DMSO, 100 nM E<sub>2</sub> or  
686 ethanol and 10  $\mu$ M of 5-ethynyl-2'-deoxyuridine (EdU, Invitrogen) for 24h. Medium was removed,  
687 the cells were washed once with PBS and 1 ml of 3.7% formaldehyde in PBS was added. The cells  
688 were fixed for 15 min at RT, then washed twice with 1 ml of 3% BSA in PBS. 1 ml of 0.5% Triton  
689 X-100 in PBS was added and the cells were incubated for 20 min at RT. Click-iT reaction master  
690 mix was prepared. [For 5 slides: 129  $\mu$ l 1x Click-iT reaction buffer (freshly diluted 1:10 in H<sub>2</sub>O), 6  
691  $\mu$ l CuSO<sub>4</sub>, 0.36  $\mu$ l AlexaFluor azide, 15  $\mu$ l reaction buffer additive (freshly diluted 1:10 in H<sub>2</sub>O)].  
692 Permeabilization buffer was removed and the cells were washed twice with 1 ml 3% BSA in PBS.  
693 30  $\mu$ l of Click-iT reaction mix were pipetted onto Parafilm and the coverslips were put cells-down  
694 onto the mix and incubated for 30 min at RT, protected from light. The coverslips were washed  
695 once with 1 ml of 3% BSA in PBS and then washed well with 1x PBS to remove BSA. After one  
696 final wash with H<sub>2</sub>O, the cells were fixed with mounting media containing 4',6-diamidino-2-  
697 phenylindole (DAPI, VectaShield). The slides were analyzed on an Olympus IX81 fluorescence  
698 microscope.

699

700 *DNA extraction, oxidation of hmC and bisulphite conversion*

701 Genomic DNA was extracted from cells using the Wizard Genomic DNA Purification Kit  
702 (Promega). DNA was eluted with water and digested with *EcoRV* overnight. EtOH precipitation  
703 was performed and DNA was additionally cleaned up on Micro Bio-Spin 6 chromatography  
704 columns in SSC (BioRad) as purity was essential for oxidation of hmC. Samples were split and one  
705 half was subjected to oxidation. Selective oxidation of hmC to fC was achieved using potassium  
706 perruthenate (KRuO<sub>4</sub>, Sigma-Aldrich) as described (Booth et al., 2012; Booth et al., 2013). In short,  
707 0.5-2 µg of DNA were incubated in 50 mM NaOH in 24 µl for 30 min at 37°C after vigorous  
708 vortexing to denature DNA. 1 µl of 15 mM KRuO<sub>4</sub> solution in 50 mM NaOH was added and  
709 oxidation was incubated on ice for 1 hours with vortexing every 5 min. Reaction was cleaned up on  
710 polyacrylamide columns (89849, ThermoScientific) and processed further with the rest of the  
711 sample for bisulphite conversion. Bisulphite conversion was achieved using the EZ DNA  
712 Methylation-Gold Kit from Zymo Research according to manufacturer's instructions. The cycling  
713 protocol was adapted because of the slightly less efficient conversion of fC as compared to  
714 unmodified cytosine (95°C for 5 min; 2x (60°C for 25 min, 95°C for 5 min, 60°C for 85 min, 95°C  
715 for 5 min, 60°C for 175 min, 95°C for 5 min); 20°C hold.

716

717 *Polymerase chain reaction on bisulphite-converted DNA*

718 100 ng of bisulphite-converted DNA was used as template for the PCR using the ZymoTaq DNA  
719 polymerase (Zymo Research). The reaction was carried out in a total volume of 40 µl in the reaction  
720 buffer provided by the manufacturer supplemented with of 1 mM dNTPs, 1.5 mM MgCl<sub>2</sub>, 500 mM  
721 each primer and 2 U of polymerase. The cycling protocol was as follows: 10 min 95°C; 5x (30 s  
722 94°C; 30 s 52°C; 90 s 72°C); 5x (30 s 94°C; 30 s 52°C; 90 s 72°C); 35x (30 s 94°C; 30 s 55°C; 90 s  
723 72°C); 7 min 72°C. The primers used for the amplification of bisulphite converted DNA are listed  
724 in Table S1 (SI). The forward primers were only added after the first 5 cycles to reduce the  
725 formation of primer dimers. The PCR fragments were purified using a BluePippin (Sage Science)

726 on a 2% agarose gel according to manufacturer's instructions, before being bar-coded for PacBio  
727 sequencing.

728

729

730

731 *PacBio sequencing and analysis*

732 The PacBio single-molecule real-time (SMRT) sequencing technology works by a strand-  
733 displacement mechanism on circularised single molecules. The highly-processive polymerase  
734 copies the circle multiple times to generate a long read containing many repeats of the same  
735 sequence. The deconvolution to single reads generates a consensus sequence that corrects the high  
736 error-rate of the polymerase, resulting thus in very accurate sequencing results. The sequencing and  
737 data evaluation were carried out in collaboration with the Functional Genomic Center Zurich  
738 ([www.fgcz.ch](http://www.fgcz.ch)).

739

740 *Affinity purification and mass spectrometry*

741 Different CpG-containing oligonucleotides with 5'-TTAA overhangs were annealed and end-to-end  
742 ligated overnight at 16°C with T4 ligase (NEB). Oligos were ethanol-precipitated and filled-in with  
743 1 mM biotinylated dUTP (Thermo Fisher) using Klenow fragment (NEB). Reactions were passed  
744 twice through a Sephadex G-25 desalting column (GE Healthcare) to get rid to free dUTP and  
745 subsequently bound to Dynabeads M-280 Streptavidin (Invitrogen) by rotating 20 min at RT.  
746 1.5 mg of nuclear extracts were pre-incubated with 30 µg of poly(dI-dC), before an equal volume  
747 was added to the beads. Binding was allowed to take place in 1x EMSA buffer without BSA for 30  
748 min on a rotating wheel at 4 °C. Beads were washed 2x with 60 µl 1x EMSA buffer without BSA.  
749 Bound proteins were eluted with 60 µl of elution buffer (10 mM Tris-HCl pH 7.6, 5 % glycerol, 1M  
750 NaCl) 30 min rotating at 4°C. Elution was desalted on 0.025 µm VSWP membranes (Merck)  
751 against water for EMSAs.

752

753 *Shotgun LC-MS/MS*

754 The protein mixture was digested with trypsin. After cleaning up, the peptide mixture was applied  
755 to a reversed phase high-performance liquid chromatography (HPLC) column and separated prior to  
756 ionization and analysis by the mass spectrometer. The peptide ions selected by an instrument  
757 algorithm for fragmentation were recorded as a peptide signature, which was analyzed by a  
758 sequence algorithm (MASCOT). The peptides were scored according to the average probability  
759 using total spectra counts. The complete list of the MS results can be found online in  
760 Supplementary Information.

761

762 *Immunodepletion of extracts*

763 50 µg Dynabeads Protein G (Invitrogen), washed in PBS-T (0.1% Tween 20), were incubated with  
764 0.4 µg of the respective antibody for 20 min at RT on rotation wheel. Beads were washed twice in  
765 PBS-T by inverting the tube several times and putting it on the magnet for 2 min. 100 µg of nuclear  
766 extracts were added and binding was allowed for 2 hours rotating at 4 °C. Supernatant was  
767 aliquoted and snap frozen as immunodepleted extract. Samples were taken for control Western  
768 Blots and EMSAs.

769

770 *Statistical analysis*

771 All experiments were performed at least three times. Results are shown as means +/- SD. Statistical  
772 significance was determined by Student's *t*-tests.  $P \leq 0.05$  was considered statistically significant.

773

774 **ACKNOWLEDGEMENTS**

775 The authors would like to express their gratitude to Hanspeter Saluz for providing hen and rooster  
776 DNA samples, to Peter Hunziker for the proteomic analysis and Giancarlo Russo for assistance with

777 the bioinformatics, to Thermo Fischer for the generous gift of the Eco72I DNA, to Beat Kunz for  
778 assistance with the egg manipulations and to Maite Olivera Harris for constructive discussions.

779

## 780 REFERENCES

- 781 Amenya, H.Z., Tohyama, C., and Ohsako, S. (2016). Dioxin induces Ahr-dependent robust DNA  
782 demethylation of the Cyp1a1 promoter via Tdg in the mouse liver. *Scientific reports* 6, 34989.
- 783 Bacolla, A., Pradhan, S., Roberts, R.J., and Wells, R.D. (1999). Recombinant human DNA  
784 (cytosine-5) methyltransferase. II. Steady-state kinetics reveal allosteric activation by methylated  
785 DNA. *The Journal of biological chemistry* 274, 33011-33019.
- 786 Baerenfaller, K., Fischer, F., and Jiricny, J. (2006). Characterization of the "mismatch repairsome"  
787 and its role in the processing of modified nucleosides in vitro. *Methods in enzymology* 408, 285-  
788 303.
- 789 Baeriswyl, T., and Stoeckli, E.T. (2006). In ovo RNAi opens new possibilities for temporal and  
790 spatial control of gene silencing during development of the vertebrate nervous system. *J RNAi*  
791 *Gene Silencing* 2, 126-135.
- 792 Baylin, S.B., Hoppener, J.W., de Bustros, A., Steenbergh, P.H., Lips, C.J., and Nelkin, B.D. (1986).  
793 DNA methylation patterns of the calcitonin gene in human lung cancers and lymphomas. *Cancer*  
794 *research* 46, 2917-2922.
- 795 Bestor, T.H. (1992). Activation of mammalian DNA methyltransferase by cleavage of a Zn binding  
796 regulatory domain. *EMBO J* 11, 2611-2617.
- 797 Binder, R., MacDonald, C.C., Burch, J.B., Lazier, C.B., and Williams, D.L. (1990). Expression of  
798 endogenous and transfected apolipoprotein II and vitellogenin II genes in an estrogen responsive  
799 chicken liver cell line. *Molecular endocrinology* 4, 201-208.
- 800 Bird, A., Taggart, M., Frommer, M., Miller, O.J., and Macleod, D. (1985). A fraction of the mouse  
801 genome that is derived from islands of nonmethylated, CpG-rich DNA. *Cell* 40, 91-99.

- 802 Booth, M.J., Branco, M.R., Ficz, G., Oxley, D., Krueger, F., Reik, W., and Balasubramanian, S.  
803 (2012). Quantitative sequencing of 5-methylcytosine and 5-hydroxymethylcytosine at single-  
804 base resolution. *Science* 336, 934-937.
- 805 Booth, M.J., Ost, T.W., Beraldi, D., Bell, N.M., Branco, M.R., Reik, W., and Balasubramanian, S.  
806 (2013). Oxidative bisulfite sequencing of 5-methylcytosine and 5-hydroxymethylcytosine.  
807 *Nature protocols* 8, 1841-1851.
- 808 Brandeis, M., Frank, D., Keshet, I., Siegfried, Z., Mendelsohn, M., Nemes, A., Temper, V., Razin,  
809 A., and Cedar, H. (1994). Sp1 elements protect a CpG island from de novo methylation. *Nature*  
810 371, 435-438.
- 811 Burch, J.B., and Weintraub, H. (1983). Temporal order of chromatin structural changes associated  
812 with activation of the major chicken vitellogenin gene. *Cell* 33, 65-76.
- 813 Campanero, M.R., Armstrong, M.I., and Flemington, E.K. (2000). CpG methylation as a  
814 mechanism for the regulation of E2F activity. *Proc Natl Acad Sci U S A* 97, 6481-6486.
- 815 Chen, B., Hsu, R., Li, Z., Kogut, P.C., Du, Q., Rouser, K., Camoretti-Mercado, B., and Solway, J.  
816 (2012). Upstream stimulatory factor 1 activates GATA5 expression through an E-box motif.  
817 *Biochem J* 446, 89-98.
- 818 Cheng, A.S., Jin, V.X., Fan, M., Smith, L.T., Liyanarachchi, S., Yan, P.S., Leu, Y.W., Chan, M.W.,  
819 Plass, C., Nephew, K.P., *et al.* (2006). Combinatorial analysis of transcription factor partners  
820 reveals recruitment of c-MYC to estrogen receptor-alpha responsive promoters. *Mol Cell* 21,  
821 393-404.
- 822 Comb, M., and Goodman, H.M. (1990). CpG methylation inhibits proenkephalin gene expression  
823 and binding of the transcription factor AP-2. *Nucleic Acids Res* 18, 3975-3982.
- 824 Cooper, D.N., Taggart, M.H., and Bird, A.P. (1983). Unmethylated domains in vertebrate DNA.  
825 *Nucleic Acids Res* 11, 647-658.
- 826 Corre, S., and Galibert, M.D. (2005). Upstream stimulating factors: highly versatile stress-  
827 responsive transcription factors. *Pigment Cell Res* 18, 337-348.



- 828 d'Adda di Fagagna, F., Marzio, G., Gutierrez, M.I., Kang, L.Y., Falaschi, A., and Giacca, M.  
829 (1995). Molecular and functional interactions of transcription factor USF with the long terminal  
830 repeat of human immunodeficiency virus type 1. *J Virol* *69*, 2765-2775.
- 831 De Smet, C., De Backer, O., Faraoni, I., Lurquin, C., Brasseur, F., and Boon, T. (1996). The  
832 activation of human gene MAGE-1 in tumor cells is correlated with genome-wide  
833 demethylation. *Proc Natl Acad Sci U S A* *93*, 7149-7153.
- 834 De Smet, C., Lurquin, C., Lethe, B., Martelange, V., and Boon, T. (1999). DNA methylation is the  
835 primary silencing mechanism for a set of germ line- and tumor-specific genes with a CpG-rich  
836 promoter. *Molecular and cellular biology* *19*, 7327-7335.
- 837 deGraffenried, L.A., Hopp, T.A., Valente, A.J., Clark, R.A., and Fuqua, S.A. (2004). Regulation of  
838 the estrogen receptor alpha minimal promoter by Sp1, USF-1 and ERalpha. *Breast Cancer Res*  
839 *Treat* *85*, 111-120.
- 840 Diamanti-Kandarakis, E., Bourguignon, J.P., Giudice, L.C., Hauser, R., Prins, G.S., Soto, A.M.,  
841 Zoeller, R.T., and Gore, A.C. (2009). Endocrine-disrupting chemicals: an Endocrine Society  
842 scientific statement. *Endocr Rev* *30*, 293-342.
- 843 Dignam, J.D., Lebovitz, R.M., and Roeder, R.G. (1983). Accurate transcription initiation by RNA  
844 polymerase II in a soluble extract from isolated mammalian nuclei. *Nucleic Acids Res* *11*, 1475-  
845 1489.
- 846 Dubey, V., and Luqman, S. (2017). Cathepsin D as a Promising Target for the Discovery of Novel  
847 Anticancer Agents. *Curr Cancer Drug Targets* *17*, 404-422.
- 848 Eckhardt, F., Lewin, J., Cortese, R., Rakyan, V.K., Attwood, J., Burger, M., Burton, J., Cox, T.V.,  
849 Davies, R., Down, T.A., *et al.* (2006). DNA methylation profiling of human chromosomes 6, 20  
850 and 22. *Nature genetics* *38*, 1378-1385.
- 851 Eden, S., and Cedar, H. (1994). Role of DNA methylation in the regulation of transcription. *Current*  
852 *opinion in genetics & development* *4*, 255-259.

- 853 Ehrlich, M. (2019). DNA hypermethylation in disease: mechanisms and clinical relevance.  
854 *Epigenetics*, 1-23.
- 855 Fujii, G., Nakamura, Y., Tsukamoto, D., Ito, M., Shiba, T., and Takamatsu, N. (2006). CpG  
856 methylation at the USF-binding site is important for the liver-specific transcription of the  
857 chipmunk HP-27 gene. *Biochem J* 395, 203-209.
- 858 Gama-Sosa, M.A., Slagel, V.A., Trewyn, R.W., Oxenhandler, R., Kuo, K.C., Gehrke, C.W., and  
859 Ehrlich, M. (1983). The 5-methylcytosine content of DNA from human tumors. *Nucleic Acids*  
860 *Res* 11, 6883-6894.
- 861 Gardiner-Garden, M., and Frommer, M. (1987). CpG islands in vertebrate genomes. *Journal of*  
862 *molecular biology* 196, 261-282.
- 863 Giacca, M., Gutierrez, M.I., Demarchi, F., Diviacco, S., Biamonti, G., Riva, S., and Falaschi, A.  
864 (1989). A protein target site in an early replicated human DNA sequence: a highly conserved  
865 binding motif. *Biochemical and biophysical research communications* 165, 956-965.
- 866 Goelz, S.E., Vogelstein, B., Hamilton, S.R., and Feinberg, A.P. (1985). Hypomethylation of DNA  
867 from benign and malignant human colon neoplasms. *Science* 228, 187-190.
- 868 Gruenbaum, Y., Naveh-Many, T., Cedar, H., and Razin, A. (1981). Sequence specificity of  
869 methylation in higher plant DNA. *Nature* 292, 860-862.
- 870 Hale, T.K., and Braithwaite, A.W. (1995). Identification of an upstream region of the mouse p53  
871 promoter critical for transcriptional expression. *Nucleic Acids Res* 23, 663-669.
- 872 Hassan, H.M., Kolendowski, B., Isovich, M., Bose, K., Dranse, H.J., Sampaio, A.V., Underhill,  
873 T.M., and Torchia, J. (2017). Regulation of Active DNA Demethylation through RAR-Mediated  
874 Recruitment of a TET/TDG Complex. *Cell reports* 19, 1685-1697.
- 875 He, Y.F., Li, B.Z., Li, Z., Liu, P., Wang, Y., Tang, Q., Ding, J., Jia, Y., Chen, Z., Li, L., *et al.*  
876 (2011). Tet-mediated formation of 5-carboxylcytosine and its excision by TDG in mammalian  
877 DNA. *Science* 333, 1303-1307.

- 878 Hou, Y., Yuan, J., Zhou, X., Fu, X., Cheng, H., and Zhou, R. (2012). DNA demethylation and USF  
879 regulate the meiosis-specific expression of the mouse Miwi. *PLoS genetics* 8, e1002716.
- 880 Hsieh, C.L. (1999). In vivo activity of murine de novo methyltransferases, Dnmt3a and Dnmt3b.  
881 *Molecular and cellular biology* 19, 8211-8218.
- 882 Hyder, S.M., Chiappetta, C., and Stancel, G.M. (1999). Interaction of human estrogen receptors  
883 alpha and beta with the same naturally occurring estrogen response elements. *Biochem*  
884 *Pharmacol* 57, 597-601.
- 885 Ismail, P.M., Lu, T., and Sawadogo, M. (1999). Loss of USF transcriptional activity in breast  
886 cancer cell lines. *Oncogene* 18, 5582-5591.
- 887 Kangaspeska, S., Stride, B., Metivier, R., Polycarpou-Schwarz, M., Ibberson, D., Carmouche, R.P.,  
888 Benes, V., Gannon, F., and Reid, G. (2008). Transient cyclical methylation of promoter DNA.  
889 *Nature* 452, 112-115.
- 890 Kirillov, A., Kistler, B., Mostoslavsky, R., Cedar, H., Wirth, T., and Bergman, Y. (1996). A role for  
891 nuclear NF-kappaB in B-cell-specific demethylation of the Igkappa locus. *Nature genetics* 13,  
892 435-441.
- 893 Klinge, C.M. (2001). Estrogen receptor interaction with estrogen response elements. *Nucleic Acids*  
894 *Res* 29, 2905-2919.
- 895 Li, E., Bestor, T.H., and Jaenisch, R. (1992). Targeted mutation of the DNA methyltransferase gene  
896 results in embryonic lethality. *Cell* 69, 915-926.
- 897 Liu, W.M., Maraia, R.J., Rubin, C.M., and Schmid, C.W. (1994). Alu transcripts: cytoplasmic  
898 localisation and regulation by DNA methylation. *Nucleic Acids Res* 22, 1087-1095.
- 899 Macleod, D., Charlton, J., Mullins, J., and Bird, A.P. (1994). Sp1 sites in the mouse aprt gene  
900 promoter are required to prevent methylation of the CpG island. *Genes & development* 8, 2282-  
901 2292.

- 902 Metivier, R., Gallais, R., Tiffoche, C., Le Peron, C., Jurkowska, R.Z., Carmouche, R.P., Ibberson,  
903 D., Barath, P., Demay, F., Reid, G., *et al.* (2008). Cyclical DNA methylation of a  
904 transcriptionally active promoter. *Nature* 452, 45-50.
- 905 Neddermann, P., and Jiricny, J. (1993). The purification of a mismatch-specific thymine-DNA  
906 glycosylase from HeLa cells. *The Journal of biological chemistry* 268, 21218-21224.
- 907 Noreen, F., Roosli, M., Gaj, P., Pietrzak, J., Weis, S., Urfer, P., Regula, J., Schar, P., and Truninger,  
908 K. (2014). Modulation of age- and cancer-associated DNA methylation change in the healthy  
909 colon by aspirin and lifestyle. *Journal of the National Cancer Institute* 106.
- 910 Okano, M., Bell, D.W., Haber, D.A., and Li, E. (1999). DNA methyltransferases Dnmt3a and  
911 Dnmt3b are essential for de novo methylation and mammalian development. *Cell* 99, 247-257.
- 912 Okano, M., Xie, S., and Li, E. (1998). Cloning and characterization of a family of novel mammalian  
913 DNA (cytosine-5) methyltransferases. *Nature genetics* 19, 219-220.
- 914 Perini, G., Diolaiti, D., Porro, A., and Della Valle, G. (2005). In vivo transcriptional regulation of  
915 N-Myc target genes is controlled by E-box methylation. *Proc Natl Acad Sci U S A* 102, 12117-  
916 12122.
- 917 Philipsen, J.N., Hennis, B.C., and Ab, G. (1988). In vivo footprinting of the estrogen-inducible  
918 vitellogenin II gene from chicken. *Nucleic Acids Res* 16, 9663-9676.
- 919 Pradhan, S., Bacolla, A., Wells, R.D., and Roberts, R.J. (1999). Recombinant human DNA  
920 (cytosine-5) methyltransferase. I. Expression, purification, and comparison of de novo and  
921 maintenance methylation. *The Journal of biological chemistry* 274, 33002-33010.
- 922 Prendergast, G.C., Lawe, D., and Ziff, E.B. (1991). Association of Myn, the murine homolog of  
923 max, with c-Myc stimulates methylation-sensitive DNA binding and ras cotransformation. *Cell*  
924 65, 395-407.
- 925 Prendergast, G.C., and Ziff, E.B. (1991). Methylation-sensitive sequence-specific DNA binding by  
926 the c-Myc basic region. *Science* 251, 186-189.

- 927 Rakyan, V.K., Hildmann, T., Novik, K.L., Lewin, J., Tost, J., Cox, A.V., Andrews, T.D., Howe,  
928 K.L., Otto, T., Olek, A., *et al.* (2004). DNA methylation profiling of the human major  
929 histocompatibility complex: a pilot study for the human epigenome project. *PLoS biology* 2,  
930 e405.
- 931 Reisman, D., and Rotter, V. (1993). The helix-loop-helix containing transcription factor USF binds  
932 to and transactivates the promoter of the p53 tumor suppressor gene. *Nucleic Acids Res* 21, 345-  
933 350.
- 934 Rimseliene, R., Vaisvila, R., and Janulaitis, A. (1995). The *eco72IC* gene specifies a trans-acting  
935 factor which influences expression of both DNA methyltransferase and endonuclease from the  
936 *Eco72I* restriction-modification system. *Gene* 157, 217-219.
- 937 Saluz, H.P., Jiricny, J., and Jost, J.P. (1986). Genomic sequencing reveals a positive correlation  
938 between the kinetics of strand-specific DNA demethylation of the overlapping  
939 estradiol/glucocorticoid-receptor binding sites and the rate of avian vitellogenin mRNA  
940 synthesis. *Proc Natl Acad Sci U S A* 83, 7167-7171.
- 941 Seal, S.N., Davis, D.L., and Burch, J.B. (1991). Mutational studies reveal a complex set of positive  
942 and negative control elements within the chicken vitellogenin II promoter. *Molecular and*  
943 *cellular biology* 11, 2704-2717.
- 944 Sensel, M.G., Binder, R., Lazier, C.B., and Williams, D.L. (1994). Reactivation of apolipoprotein II  
945 gene transcription by cycloheximide reveals two steps in the deactivation of estrogen receptor-  
946 mediated transcription. *Molecular and cellular biology* 14, 1733-1742.
- 947 Tahiliani, M., Koh, K.P., Shen, Y., Pastor, W.A., Bandukwala, H., Brudno, Y., Agarwal, S., Iyer,  
948 L.M., Liu, D.R., Aravind, L., *et al.* (2009). Conversion of 5-methylcytosine to 5-  
949 hydroxymethylcytosine in mammalian DNA by MLL partner TET1. *Science* 324, 930-935.
- 950 Thomassin, H., Flavin, M., Espinas, M.L., and Grange, T. (2001). Glucocorticoid-induced DNA  
951 demethylation and gene memory during development. *EMBO J* 20, 1974-1983.

- 952 Toker, A., Engelbert, D., Garg, G., Polansky, J.K., Floess, S., Miyao, T., Baron, U., Duber, S.,  
953 Geffers, R., Giehr, P., *et al.* (2013). Active demethylation of the Foxp3 locus leads to the  
954 generation of stable regulatory T cells within the thymus. *Journal of immunology* *190*, 3180-  
955 3188.
- 956 Toyota, M., Ahuja, N., Ohe-Toyota, M., Herman, J.G., Baylin, S.B., and Issa, J.P. (1999). CpG  
957 island methylator phenotype in colorectal cancer. *Proc Natl Acad Sci U S A* *96*, 8681-8686.
- 958 Walsh, C.P., Chaillet, J.R., and Bestor, T.H. (1998). Transcription of IAP endogenous retroviruses  
959 is constrained by cytosine methylation. *Nature genetics* *20*, 116-117.
- 960 Wiebauer, K., and Jiricny, J. (1989). In vitro correction of G.T mispairs to G.C pairs in nuclear  
961 extracts from human cells. *Nature* *339*, 234-236.
- 962 Wilks, A., Seldran, M., and Jost, J.P. (1984). An estrogen-dependent demethylation at the 5' end of  
963 the chicken vitellogenin gene is independent of DNA synthesis. *Nucleic Acids Res* *12*, 1163-  
964 1177.
- 965 Wilks, A.F., Cozens, P.J., Mattaj, I.W., and Jost, J.P. (1982). Estrogen induces a demethylation at  
966 the 5' end region of the chicken vitellogenin gene. *Proc Natl Acad Sci U S A* *79*, 4252-4255.
- 967 Woodcock, D.M., Lawler, C.B., Linsenmeyer, M.E., Doherty, J.P., and Warren, W.D. (1997).  
968 Asymmetric methylation in the hypermethylated CpG promoter region of the human L1  
969 retrotransposon. *The Journal of biological chemistry* *272*, 7810-7816.
- 970 Xing, W., and Archer, T.K. (1998). Upstream stimulatory factors mediate estrogen receptor  
971 activation of the cathepsin D promoter. *Molecular endocrinology* *12*, 1310-1321.

972

## 973 **FIGURE LEGENDS**

- 974 **Fig 1. Sequence of the VTG enhancer/promoter, its methylation and inducibility *in vivo*. A,**  
975 Sequence of the enhancer/promoter region of the chicken VTG gene. The ERE binding site (violet),  
976 the CpGs (green) and the translation start site (yellow) are highlighted. The four CpGs (**a-d**)  
977 analyzed in Saluz *et al.* (Saluz et al., 1986) are indicated, as well as the additional six CpGs (3-8) in

978 the enhancer/promoter region. **B**, Bisulphite sequencing of CpGs **a-d** in LMH/2A cells. **C,D** *VTG*  
979 mRNA levels measured by RT-qPCR after 6 and 24 hours of 100 nM E<sub>2</sub> treatment (**C**) and upon  
980 additional treatment with 8 μM aphidicolin (aph) or DMSO for 24h (**D**). Data are represented as  
981 mean ± SD. Significance was assessed using Sidak's multiple comparisons test. \*P≤0.05, \*\*P≤0.01,  
982 \*\*\*P≤0.001, \*\*\*\*P≤0.0001. **E**, Upper panel: Western Blot of chromatin extracts  
983 immunoprecipitated with Flag- or ERα antibodies (- and + β-estradiol treatment). Lower panel:  
984 Ratio of RT-qPCR signal of immunoprecipitated versus input DNA.  
985  
986 **Fig 2. Electrophoretic mobility shift analysis of ERE-binding proteins.** **A**, EMSA with 60 ng  
987 recombinant ERα and unmethylated ERE wt oligo (C/C), with (+, lane 3) or without (-, lanes 1, 2,  
988 4-7) E<sub>2</sub> or competitor. The specific competitor (spec, lane 4) was the unlabelled ERE wt duplex  
989 C/C, the unspecific competitor (unspec, lane 5) was an unrelated duplex of similar length. An  
990 antibody against ERα (MA5-13065, lane 7) or BSA (lane 6) were used in the supershift experiment  
991 with the unmethylated oligo C/C. The oligonucleotides used for the EMSAs are depicted below the  
992 autoradiograph. Purple, consensus ERE; green, CpGs. The ΔG duplex contains a single base pair  
993 deletion (white) in the spacer region between the two dyad-symmetry elements of the ERE. **B**,  
994 Upper panel: representative EMSAs with increasing concentrations of recombinant ERα (0, 5, 10,  
995 20, 30, 40, 80 and 200 ng) and unmethylated (C/C, left panel) or methylated (mC/mC, right panel)  
996 ERE wt or ΔG oligo with 40 ng of ERα. (In the mC/mC duplex both CpGs were symmetrically-  
997 methylated.) Lower panel: Quantification of percentage bound oligo in three independent  
998 experiments. Data are represented as mean ± SD. **C**, EMSA comparing the binding of recombinant  
999 ERα protein or LMH/2A NEs to shorter duplexes (ERE short shown below the autoradiograph)  
1000 unmethylated (C/C) and methylated (mC/mC) or a shorter ΔG oligo (ΔG short). **D**, Left panel:  
1001 EMSA with the indicated duplexes and LMH/2A NE supplemented with the indicated amounts of  
1002 recombinant ERα. Right panel: Quantification of the ratio of oligo bound by ERα or factor X in  
1003 three independent experiments. Data are represented as mean ± SD. Significance was assessed

1004 using the Holm-Sidak test. **E**, Top panel: EMSA with LMH/2A nuclear extracts and five duplexes  
1005 containing the indicated CpGs from the *VTG* enhancer/promoter (Fig. 1A), bearing different  
1006 combinations of cytosines and methylcytosines. Bottom panel: Quantification of percentage bound  
1007 oligo in three independent experiments. Data are represented as mean  $\pm$  SD. Significance was  
1008 assessed using the Tukey test for multiple comparisons. The panels show autoradiographs of non-  
1009 denaturing 6% polyacrylamide gels eluted with TAE buffer. \* $P \leq 0.05$ , \*\* $P \leq 0.01$ , \*\*\* $P \leq 0.001$ ,  
1010 \*\*\*\* $P \leq 0.0001$ .

1011

1012 **Fig 3. Identification of Factor X by UV cross-linking.** **A**, Experimental set-up showing the  
1013 position of the BrdU residues in the indicated duplex substrates. The binding reactions contained  
1014 either 60  $\mu$ g of LMH/2A NE or recombinant ER $\alpha$ . **B**, Proteins cross-linked to the oligo substrates  
1015 shown in A (unmethylated or methylated as indicated). **C**, As in B, but the cross-linking reactions  
1016 were supplemented with the indicated amounts of recombinant ER $\alpha$  or competitor oligo. The cross-  
1017 linked complexes were resolved by 10% SDS-PAGE and visualised by autoradiography.

1018

1019 **Figure 4. Identification of Factor X by affinity chromatography/MS.** **A**, Experimental set-up of  
1020 affinity pull-down and mass spectrometric analysis. The oligonucleotide duplexes were ligated end-  
1021 to-end, tailed with bio-dUMP and bound to streptavidin Dynabeads. The beads were incubated with  
1022 the extracts and the eluted proteins were analysed by MS as described in Materials and Methods. **B**,  
1023 EMSA with oligo duplex CpG7 (left panel) or  $\Delta$ G (right panel) and HeLa NE preincubated with the  
1024 indicated antibodies. **C**, Supershift using oligo duplex CpG7 and antibodies specific for USF1 or  
1025 USF2. **D**, UV cross-linking reactions. Depleted extracts (lanes 1-4) and proteins eluted from the  
1026 Dynabeads (lanes 5-8) were bound to the unmethylated ERE oligo, UV-cross-linked, separated on  
1027 SDS-PAGE and visualized by autoradiography.

1028



1029 **Figure 5. Estrogen inducibility of VTG-CpGL luciferase reporter vector transfected into**  
1030 **LMH/2A cells. A,** Luciferase expression before and after *in vitro* methylation of the ERE C/C (wt)  
1031 or  $\Delta$ G vectors with *SssI*. **B,** Same as A, but the ERE sequence was replaced with oligonucleotides  
1032 carrying the indicated cytosine modifications only in CpGs **d** and **c**. **C,** Same as A, but either with  
1033 wt VTG-CpGL or the mutated reporter in which all CpGs except for the ERE and CpG7 were  
1034 substituted for TpGs, +/-*SssI*. **D,** Luciferase expression from the reporter before and after  
1035 methylation with *Eco72IM*, *HpaII.M* or *SssI*. *Eco72IM* without S-adenosylmethionine (-SAM) was  
1036 used as control, the other methylation reactions were performed in the presence of SAM (+SAM).  
1037 Significance was assessed using the Tukey test for multiple comparisons. \* $P \leq 0.05$ , \*\* $P \leq 0.01$ ,  
1038 \*\*\* $P \leq 0.001$ , \*\*\*\* $P \leq 0.0001$ . **E,** Luciferase assay using VTG-CpGL linearised with the indicated  
1039 enzymes, methylated with *SssI* and religated. The purified circular DNA was then transfected into  
1040 LMH/2A cells. In these substrates, the cleaved restriction site remained unmethylated after the  
1041 circularisation. The ratio between methylated and unmethylated is shown. **F,** Luciferase assay using  
1042 unmethylated VTG-CpGL in LMH/2A cells in which USF1 was depleted with siRNA; siLuc was  
1043 used as control [NB: this siRNA does not recognise either of the luciferases expressed from our  
1044 vectors]. Relative luciferase units (RLU) are defined as ratio between firefly and *Renilla* signal. The  
1045 graphs show the mean  $\pm$  SD of three independent experiments. **G,** RT-qPCR of *VTG* mRNA  
1046 isolated from cells treated with siLuc or siUSF1 for 96 hours and EtOH or  $E_2$  for the last 24 h. The  
1047 graph shows the mean  $\pm$  SD of three independent experiments. Significance was assessed using  
1048 Sidak's multiple comparisons test. \* $P \leq 0.05$ , \*\* $P \leq 0.01$ , \*\*\* $P \leq 0.001$ , \*\*\*\* $P \leq 0.0001$ .

1049  
1050 **Table 1.** Peptides identified by LC-MS/MS in fractions eluted from affinity chromatography on the  
1051 indicated oligonucleotide matrices. To subtract proteins that bound unspecifically to the matrix ,  
1052 beads only were used. As a second filter, we used an oligonucleotide containing the sequence  
1053 around CpG8 that showed no binding of factor X in the EMSA experiments. Significance was

1054 assessed with an ANOVA multiple comparison t-test. Only hits identified with >95% confidence  
1055 are shown. The false discovery rate (FDR) threshold was set to 1%.  
1056

Figure 1

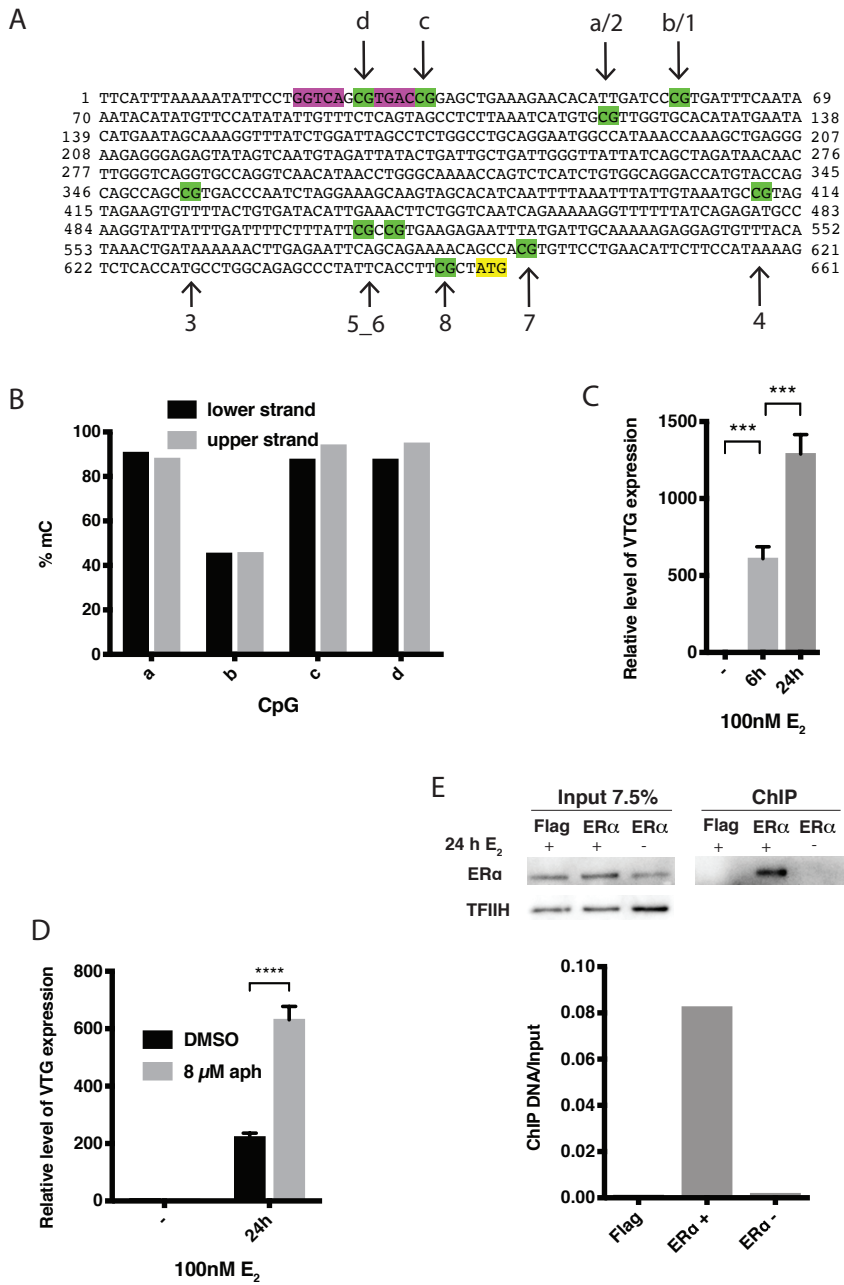



Figure 3

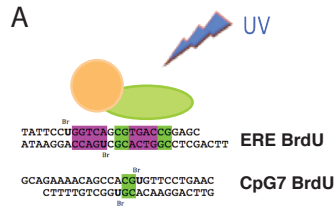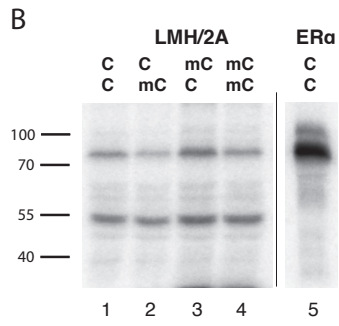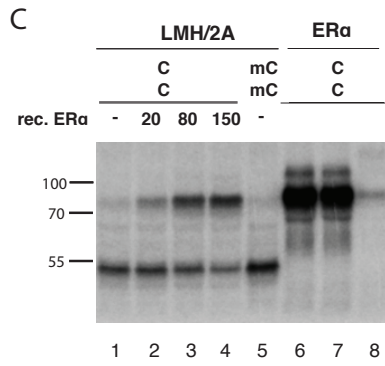

## Figure 4

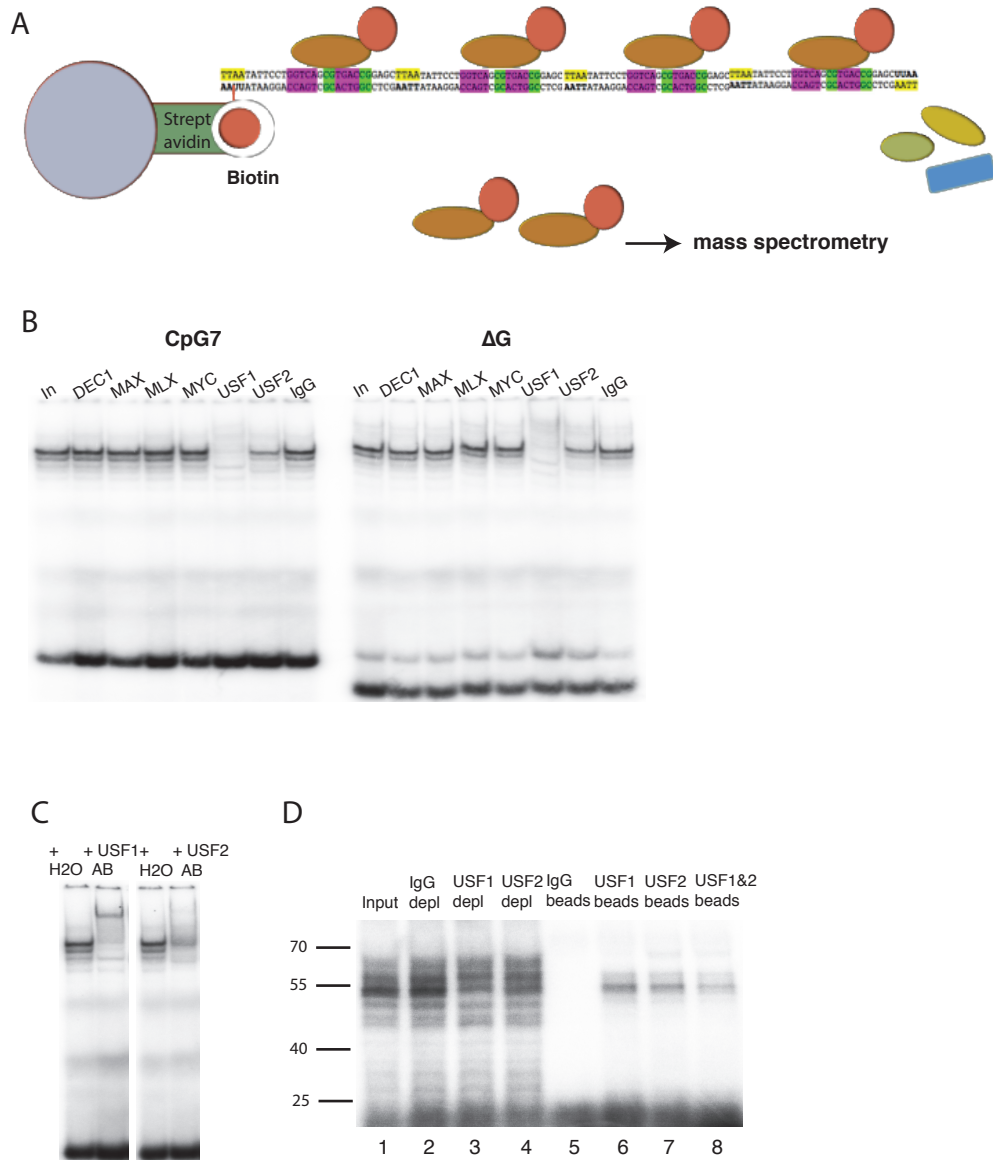

Figure 5

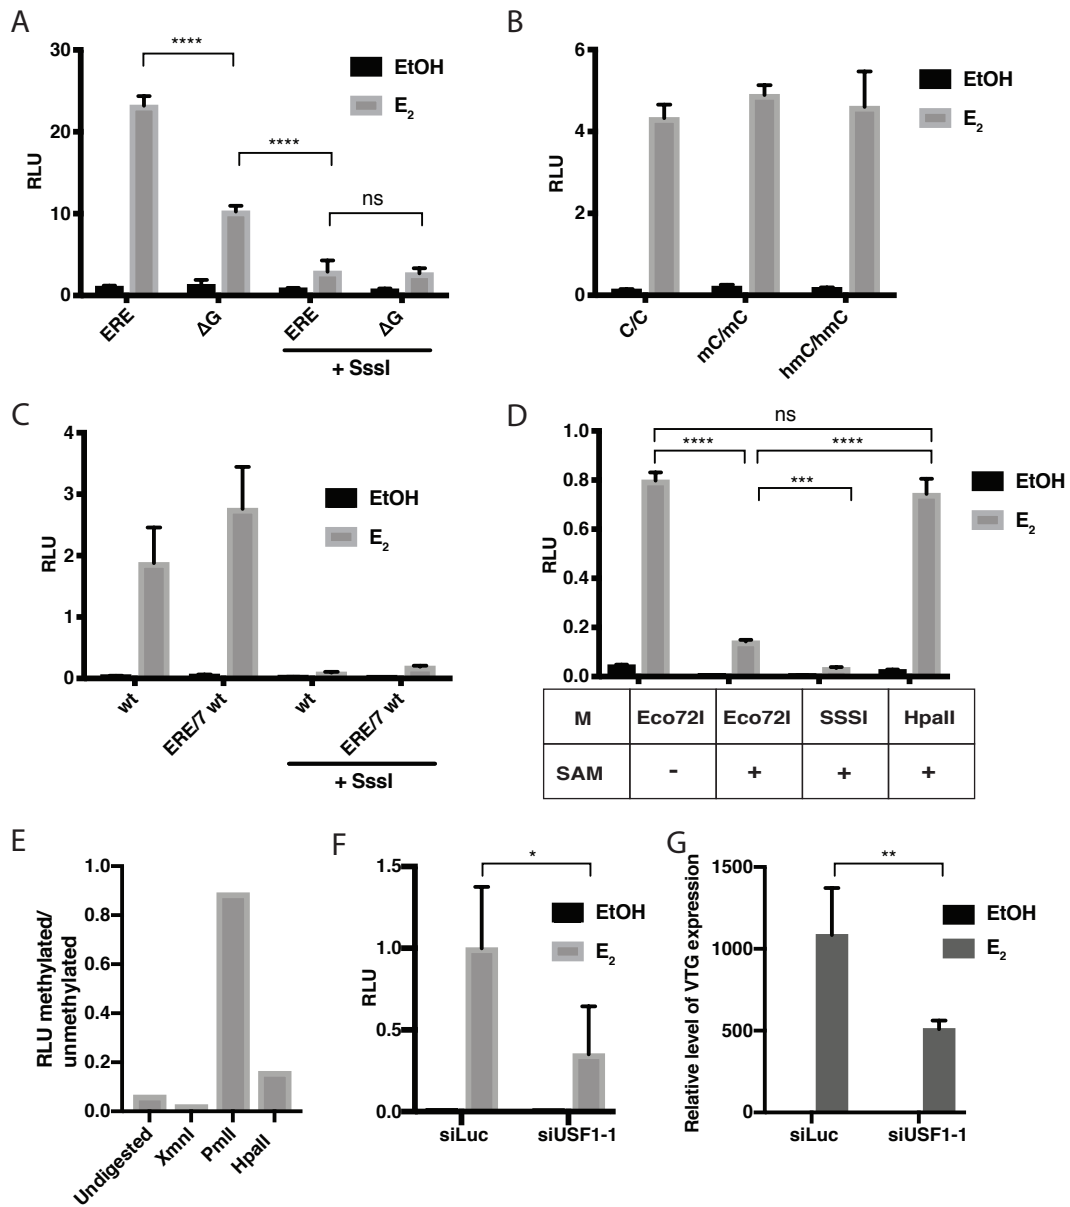

| Gene    | MW (kDa) | CpG 7    | CpG 8 | ERE    | beads | ΔG       | mCpG 7  | mERE     | Quantitative profile ANOVA |
|---------|----------|----------|-------|--------|-------|----------|---------|----------|----------------------------|
| MAX     | 18       | 6 7 6    |       | 5 5 2  |       | 5 5 5    | 5 4 5   | 2 2 2    | ↑↓↑↓↑↓↑↓                   |
| MAFF    | 18       | 2        |       | 2 2    |       |          |         | 3 3 3    | ↓↓↓↓↓↑↑                    |
| MAFK    | 18       | 5 7 3    |       | 8 6 2  |       |          | 4 2     | 9 9 6    | ↑↓↑↓↑↓↑↓                   |
| SAP30   | 23       | 3 6 2    |       |        |       | 2 2      | 2       |          |                            |
| BRMS1   | 28       | 7 7 4    |       | 3 3    |       | 3 2      | 2       |          | ↑↓↓↓↓↓↓                    |
| MLX     | 33       | 10 9 9   |       | 8 6    |       | 12 13 12 |         | 4        | ↑↓↓↓↑↓↓                    |
| USF1    | 34       | 6 5 6    |       | 7 4    |       | 7 5 6    | 3 3 3   | 4 5 5    | ↑↓↑↓↑↓↑↓                   |
| FOSL2   | 35       | 8 8 6    | 7 6 5 | 7 6 2  | 2     | 5 4 5    | 2 2     | 9 5 7    | ↑↑↑↓↑↓↑                    |
| USF2    | 37       | 9 9 10   |       | 8 10 2 |       | 8 10 10  | 6 3 2   | 6 4 3    | ↓↑↓↑↓↑↑                    |
| BRMS1L  | 38       | 5 6 3    |       |        |       | 2        | 2       |          | ↑↓↓↓↓↓↓                    |
| SDS3    | 38       | 6 7 6    |       | 3 2    |       | 3 3      | 4       |          | ↑↓↓↓↓↓↓                    |
| TFAP4   | 39       | 21 23 17 | 5 5 5 | 11 8   | 3 3   | 13 11 6  | 19 8 11 | 11 7 5   | ↑↓↓↓↓↑↓                    |
| BHLHE40 | 46       | 12 17 8  |       | 9 7 2  |       | 14 18 15 |         | 2 2      | ↑↓↓↓↑↓↓                    |
| MYC     | 49       | 3 3 3    |       |        |       |          |         |          |                            |
| ZBTB26  | 50       | 2 2 2    |       |        |       |          | 2 3     |          | ↑↓↓↓↓↑↓                    |
| ZBTB9   | 51       | 8 10 8   |       |        |       | 8 8 5    | 11 4 7  | 2        | ↑↓↓↓↑↑↓                    |
| ATF7    | 52       | 7 4 4    | 7 6 4 | 9 5    |       | 9 7 6    |         | 7 5 3    |                            |
| MeCP2   | 52       |          |       | 8 3    |       | 3 2      | 13 6 8  | 18 16 13 | ↓↓↓↓↓↑↑                    |
| FOXC1   | 57       | 20 16 8  |       |        |       |          | 20 8 12 |          | ↑↓↓↓↓↑↓                    |
| UBP1    | 60       | 3 3 3    |       | 10 6   |       | 3 4      | 7 3 4   | 11 6 3   |                            |
| MNT     | 62       | 17 14 9  |       | 6 2    |       | 10 5 3   | 2       |          | ↑↓↓↓↓↓↓                    |
| MBD4    | 66       |          |       |        |       |          | 7 5 6   | 11 7 8   | ↓↓↓↓↓↑↑                    |
| FOXK2   | 69       | 17 19 14 |       |        |       | 3 2      | 10 2 4  |          | ↑↓↓↓↓↓↓                    |
